# Supplementary material for: Disulfide stress-induced aluminium toxicity: molecular insights through genome-wide screening of Saccharomyces cerevisiae
Source: Royal Society of Chemistry journal article supplement (doi:10.1039/c3mt00083d), 2013-01-01
Supplement: c3mt00083d.pdf [file c3mt00083d.pdf]

**Supplementary Information 2.** Synoptic view of the clusters obtained by the means of hierarchical clustering analysis

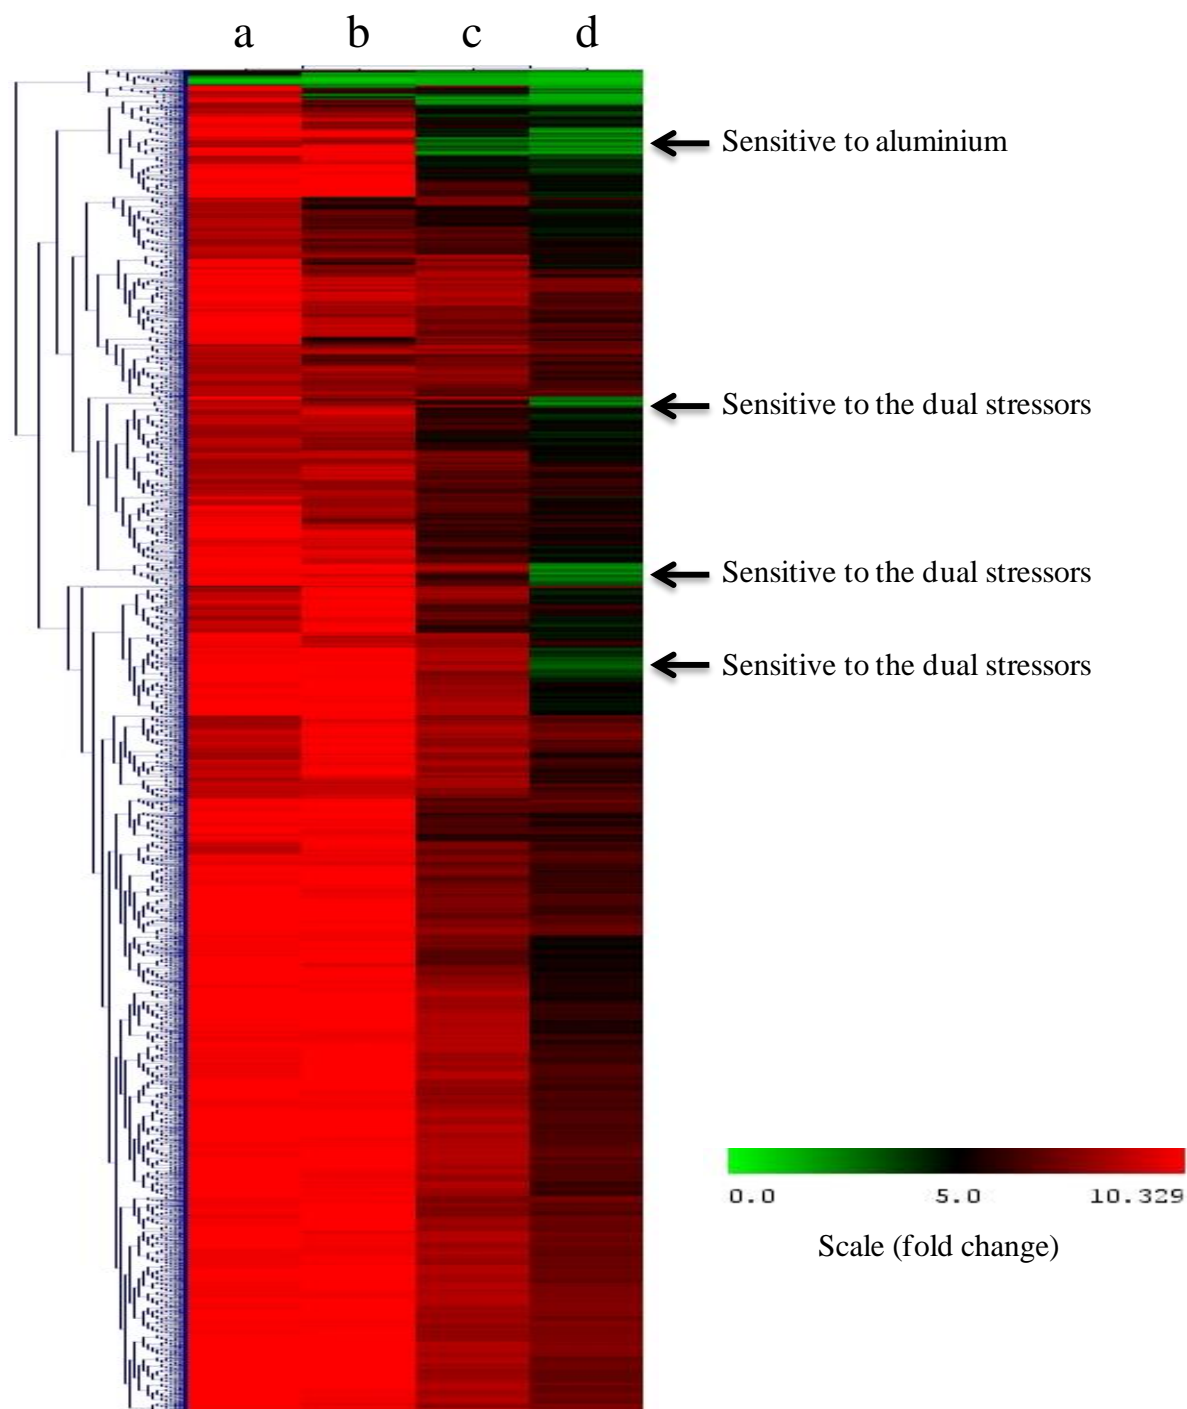

Note: The clusters of mutants screened under four conditions were revealed by MeV hierarchical analysis program. **a** denotes medium only, **b** diamide only, **c** aluminium only and **d** denotes aluminium plus diamide treatment. Fold changes ranging from 1.0-10.0 are expressed in colours from green to red. The three clusters sensitive to the dual stressors are the focus of this study, which are compiled together in Fig. 1A.
