# Supplementary material for: Disulfide stress-induced aluminium toxicity: molecular insights through genome-wide screening of Saccharomyces cerevisiae
Source: Royal Society of Chemistry journal article supplement (doi:10.1039/c3mt00083d), 2013-01-01
Supplement: c3mt00083d.xlsx [file c3mt00083d.xlsx]

## Sheet: Sheet1
Supplementary Information 1	Phenotypic growth dataset of deletion mutants and BY 4743 wild type (in fold changes)
ORF	Control	Diamide 0.8mM	Al3+ 0.4 mM	Diamide 0.8 mM + Al3+ 0.4 mM
BY 4743	10.7087	10.7807	8.11928	6.5551
YBL095W	8.888	8.61068	5.38826	4.64021
YBL096C	9.10084	9.33663	6.15077	4.27451
YBL098W	8.92828	10.977	5.82609	4.53927
YBL099W	9.48939	8.81053	6.27048	4.32642
YBL100C	10.8481	7.981	6.25	4.45979
YBL101C	9.81006	7.10104	5.6	4.43434
YBL102W	10.1091	7.10333	5.78235	4.41361
YBL104C	10.8582	7.3461	6.58375	5.32297
YBL106C	9.58311	10.1001	5.83182	4.63102
YBL107C	8.55283	10.3478	5.67626	4.49457
YBR001C	8.84108	8.05881	6.14062	4.97661
YBR003W	10.8081	8.84108	6.35088	4.39779
YBR005W	10.82	10.339	7.528	5.776
YBR006W	8.85849	7.10107	5.75	4.32544
YBR007C	9.48583	7.3691	6.00763	4.59793
YBR008C	9.44101	7.10671	5.4	4.64735
YBR009C	10.83	8.42991	6.55263	4.90174
YBR010W	9.41009	9.25961	5.80852	4.37173
YBR012C	8.4589	7.46104	5.44585	4.77654
YBR013C	8.38481	7.39695	5.85401	4.6117
YBR014C	8.48411	6.95	5.61644	4.50256
YBR015C	9.29803	8	4.07317	3.69364
YBR016W	8.9101	7.10679	6.88771	4.5625
YBR018C	8.49585	6.68276	5.70822	4.5445
YBR019C	10.8101	7.10971	6.08824	5.01754
YBR020W	9.08481	8.8101	6.14861	4.54497
YBR022W	8.85	7.82927	5.82488	4.51337
YBR023C	8.28105	8.24108	5.42187	3.94416
YBR024W	8.04888	7.63281	6.16784	5.04494
YBR025C	8.10899	7.7101	5.70714	4.60795
YBR026C	9.8	9.1	6.38167	5.1357
YBR027C	8.89091	7.7541	6.1626	4.7076
YBR028C	9.34286	7.70635	6.78167	5.23636
YBR030w	8.84545	7.0101	5.86241	4.79777
YBR031W	10.51	7.45736	5.34646	4.13559
YBR032W	8.90909	9.00935	5.28538	4.11374
YBR033W	8.41089	7.05109	5.18429	4.22335
YBR034C	8.48009	7.65354	5.42177	4.77356
YBR035C	9.88104	8.10371	4.3	3.45402
YBR036C	8.9831	7.10094	5.24658	4.11111
YBR037C	8.28101	8.31	5.38406	4.26742
YBR038W	8.5989	6.85811	5.38486	4.41748
YBR040W	8.99109	7.07971	5.78833	4.47454
YBR041W	8.88095	7.10029	5.74815	4.52571
YBR042C	8.10511	6.10101	3.6883	3.11667
YBR043C	8.88384	6.105	5.51748	4.77966
YBR044C	10.5108	8.3931	7.34167	4.67717
YBR045C	9.8101	7.46104	5.72464	4.57923
YBR046C	9.10098	8	6.80301	4.64765
YBR047W	8.59849	8.10445	6.2083	5.11656
YBR048W	8.80358	9	4.64801	3.95707
YBR050C	8.81004	7.59375	5.70288	4.35714
YBR051W	8.251	8.10333	5.80435	4.60317
YBR052C	8.08388	7.76984	6.3622	4.6977
YBR053C	8.5391	7.4691	6.27344	5.14545
YBR054W	8.40351	7.10409	6.24603	4.97701
YBR056W	9.38105	8.74545	5.60889	4.76127
YBR057C	10.1086	8.26724	4.21888	3.69492
YBR058C	9.28811	8.37108	4.83287	3.73616
YBR059C	8.88388	7.79839	5.68588	4.97702
YBR062C	9.33854	8.2735	5.83824	4.60541
YBR063C	8.89811	7.8	6.06877	4.19271
YBR064W	8.04959	8.04101	6.66817	4.72658
YBR065C	8.44829	8.08403	6.57377	4.77078
YBR066C	8.085	7.31043	6.38709	4.70166
YBR067C	9.10094	6.67103	5.62759	4.75762
YBR068C	9.88311	7.991	5.16381	4.76023
YBR069C	10.5889	8.10086	5.67883	4.5291
YBR071W	9.89896	7.85366	5.38188	4.75311
YBR072W	9.92929	8.31056	5.82143	4.37374
YBR073W	9.81088	8.40101	5.58333	4.54678
YBR074W	9.9899	7.72441	5.40861	4.4153
YBR075W	10.1056	8.04839	5.83287	4.79143
YBR076W	9.10581	7.63566	5.76761	4.71575
YBR077C	10.449	8.67241	6.576	5.59615
YBR078W	9.95851	7.58611	4.81538	4.97278
YOR289W	10.881	10.7955	6.21774	5.92471
YOR290C	10.88	10.041	2.45872	2.44643
YOR291W	10.82	9.94791	5.64706	5.92178
YOR292C	10.8888	10.401	5.86047	5.51515
YOR293W	10.4444	10.667	6.54884	5.45455
YOR295W	1.10404	1.10308	1.575	1.20202
YOR296W	10.1041	9.83696	6.08809	4.99194
YOR297C	10.8101	9.1033	6.27778	5.07432
YOR298W	10.8483	8.99065	6.67742	5.47227
YOR299W	10.2891	9.29411	6.27642	5.06703
YOR300W	9.51058	8.89611	6.28	4.55478
YOR301W	10.5851	10.0426	6.55462	4.94702
YOR304C-A	10.9	10.024	5.80882	5.35658
YOR304W	10.0386	10.5376	6.22851	5.37235
YOR305W	10.8	10.105	6.67826	5.2093
YOR306C	10.8284	9.10101	6.65574	5.507
YOR307C	10.8104	9.10101	6.36066	5.033
YOR308C	10.359	10.01	7.17273	5.063
YOR309C	10.025	10.102	6.38043	4.65714
YOR311C	9.44109	6.52811	6.08661	5.14778
YOR312C	10.088	10.0625	6.08387	5.071
YOR313C	10.8556	10.104	6.08855	5.63767
YOR314W	10.101	9.5	6.21642	5.54015
YOR315W	10.5591	9.5	5.88362	5.70766
YOR316C	10.859	10.6778	7.06857	5.77525
YOR318C	9.58436	8.77273	5.75	5.23973
YOR320C	10.3011	9.78351	5.68853	4.96
YOR321W	10.0829	9.7449	6.18582	5.32638
YOR322C	10.8384	10.6106	5.85714	5.31206
YOR323C	8.84806	6.93939	5.46729	4.62162
YOR324C	10.988	10.4891	5.6884	5.252
YOR325W	10.943	10.1	5.68429	5.045
YOR327C	9.8101	10.058	5.38849	5.145
YOR328W	10.1031	10.282	5.88425	5.022
YOR330C	8.85828	10.502	6.55556	6.14062
YOR331C	9.808	8.66	7.344	5.167
YOR332W	10.103	10.561	3.38828	4.07172
YOR333C	10.91	10.41	6.3	6.09091
YOR334W	10.353	10.402	6.61864	5.27947
YOR337W	9.08333	7.78106	5.44737	5.0443
YOR338W	10.0929	9.54455	5.85556	5.01342
YOR339C	8.88581	8.88991	5.48324	5.05369
YOR342C	9.3806	8.63964	6.28008	5.11178
YOR343C	9.45038	9.10286	6	5.05921
YOR344C	8.33051	9.97938	5.68388	4.73018
YOR345C	9.88889	10.667	5.82857	4.76471
YOR346W	9.4488	9.65306	6.06667	4.77079
YOR347C	9.10981	9.29106	6.88889	4.53216
YOR348C	8.88504	7.64567	6.80285	5.69231
YOR349W	9.55881	8.45103	6.08701	5.7705
YOR350C	10.9888	10.4725	6.48361	5.7706
YOR351C	9.81088	10.2	6.68167	6.03776
YOR352W	8.105	10.0311	5.88474	5.5274
YOR354C	8.10008	7.84426	6.17778	4.95092
YOR355W	9.81033	10.0108	6.64463	5.61702
YOR356W	9.58843	9.7449	6.55888	5.74615
YOR357C	9.88109	9.67327	6	5.42571
YOR358W	10.8483	10.381	6.28088	5.45577
YOR359W	9.41005	8.41064	6.80328	4.7
YOR360C	10.1085	9.34511	6.58333	5.75366
YOR363C	8.88984	8.7757	5.47407	5.53191
YOR365C	8.98105	8.29565	5.37584	5.19728
YOR366W	9.8	8.4955	5.86364	5.37063
YOR367W	8.81081	7.84298	5.48254	5
YOR368W	10.4088	9.07767	5.804	5.29371
YOR369C	10.8089	9.7449	5.885	5.03311
YOR371C	9.10101	9.05108	5.68852	4.77435
YOR374W	10.1082	9.25961	5.77778	5.2448
YOR375C	9.41009	8.75455	5.58268	5.17123
YOR376W	8.33051	9.81033	5.816	4.79241
YOR377W	8.08284	8.10711	5.63809	4.57673
YOR378W	8.33333	8.58929	6.28032	5.2
YOR379C	9.33333	8.25	6.03837	4.74906
YOR380W	8.54386	8.57103	6.52883	4.96711
YOR381W	9.48583	8.35651	6.56887	4.96774
YOR382W	8.0901	8.40351	5.876	4.53571
YOR383C	8.8899	7.48837	5.81818	4.37778
YOR384W	9.10101	8.40107	6.20455	5.034
YOR385W	8.10354	7.10699	6.20741	5.99276
YOR386W	9.58895	8.28037	6.688	5.34576
YOL001W	10.888	10.705	6.84624	5.13778
YOL002C	9.10101	7.28926	6.01408	5.07143
YOL003C	10.983	9.1087	6.48718	5.17692
YOL004W	9.84084	9.37975	6.58	5.956
YOL006C	10.2884	10.9747	5.58015	4.75397
YOL007C	9.40404	9.24242	6.36364	5.294
YOL008W	10	8.86869	6.81586	5.93617
YOL009C	9.28889	8.0404	5.25281	5.092
YOL011W	10.2899	10.3953	5.84777	5.92308
YOL012C	10.028	10.703	6.82373	5.07208
YOL013C	10.8588	10.9411	7.5	5.93243
YOL014W	9.82886	8.30556	6.03588	5.577
YOL015W	9.39105	9.31059	6.14074	6
YOL017W	9.0099	9.10588	6.37405	5.53906
YOL018C	10.389	10.943	6.86364	6.01776
YOL019W	8.388	8.41056	5.31646	5.07971
YOL020W	8.91009	9.26311	5.70288	5.35938
YOL023W	10.053	10.01	6.43548	5.47
YOL024W	9.10489	9.62766	5.20859	5.72
YOL025W	10.4545	10.538	5.46154	5.56494
YOL027C	10.338	9.39773	6.84615	5.64754
YOL028C	10.4091	10.4253	6.84553	5.707
YOL029C	9.8801	9.87778	6.42748	5.54264
YOL030W	9.5588	10.4411	6.78032	5.35337
YOL031C	8.33081	9.61053	5.78523	5.91034
YOL032W	8.84103	7.94643	6.02878	5.35
YOL033W	10.383	10.653	7.08889	6.33333
YOL035C	10.083	10.4828	7.86753	6.40602
YOL036W	10.8326	10.9878	6.37405	6.01417
YOL037C	10.982	9.891	6.04286	5.7551
YOL039W	8.08384	8.07407	5.04575	4.76708
YOL041C	8.81085	9.74107	4.15842	4.21014
YOL042W	8.38843	8.58654	6.454	5.3758
YOL043C	9.83888	8.10511	5.58158	5.30435
YOL044W	9.81093	9.05105	5.8168	5.75315
YOL045W	9.94545	8.80851	5.4538	5.0473
YOL046C	8.4434	8.45	5.4	5.13245
YOL047C	9.1088	10.541	6.15788	5.57333
YOL048C	9.25	9.49461	6.84328	5.76351
YOL049W	10.831	9.651	5.40645	5.23926
YOL050C	9.28531	8.67	6.48853	6.17976
YOL051W	9.8881	10.109	6.82243	5.70733
YOL052C	9.48391	9.83696	6.3	6.00769
YOL053C-A	9.88043	10.4286	6.576	5.626
YOL053W	9.88828	10.0341	6.50819	6.07246
YOL054W	8.85	10.431	6.62	5.952
YOL055C	8.98891	8.00901	6.74336	5.40645
YOL056W	9.39105	10.4511	7.32075	6.63566
YOL057W	9.55108	10.1036	7.62	6.17518
YOL058W	9.58948	10.0101	7.14853	6.22302
YOL059W	10.3888	10.2763	7.35285	6.26667
YOL060C	10.1084	10.038	7.32022	5.96528
YOL061W	9.03848	8.08929	6.552	5.51592
YOL062C	9.8841	8.68269	6.84615	5.79655
YOL063C	10.3596	10.2436	7.18349	6.17517
YOL064C	9.8101	9.57647	6.06034	5.72353
YOL065C	9.94381	10.0278	7.18048	6.14925
YOL067C	9.48958	10.6296	5.87222	5.27073
YOL068C	8.81053	10.6101	7.05357	5.72473
YOL070C	10.8806	10.4783	8.81869	6.0292
YOL071W	10.511	10.671	8.32059	5.53746
YOL072W	10.8406	10.4576	6.33636	5.36029
YOL075C	10.385	9.9101	7.67327	5.77406
YOL076W	3.44281	3.66101	1.62245	1.79646
YOL079W	8.38889	9.1	6.06452	4.95707
YOL080C	9.51048	9.47911	6.73214	5.075
YOL081W	10.45	10.291	3.26667	2.11372
YOL082W	9.95851	10.0787	7.63725	5.49342
YOL083W	10.5844	9.73034	7.40404	5.32795
YOL084W	9.8109	10.5783	7.86807	5.19231
YOL085C	9.10881	8.91	8.5	4.64407
YGL101W	8.39344	8.2931	4.73016	4.67063
YGL104C	8.44088	6.41047	5.34545	4.71428
YGL105W	10.408	9.62626	6.168	5.77976
YGL107C	10.804	9.10871	6.30702	4.97163
YGL108C	8.48889	6.79451	5.71429	4.93956
YGL109W	10.8109	8.29508	7.62264	6.57692
YGL110C	8.88485	6.43791	5.57585	4.92718
YGL114W	8.9851	9.06364	5.28816	4.46428
YGL115W	8.94109	7.90104	5.2648	4.71697
YGL117W	8.034	7.10464	5.55346	5.15428
YGL118C	10.1085	9.65049	6.63846	5.63014
YGL121C	8.80102	7.10565	5.8	5.15758
YGL124C	10.988	10.381	6.02739	4.30207
YGL125W	9.981	10.625	4.48686	3.92273
YGL126W	8.88488	10.8611	5.74	4.35354
YGL127C	8.108	8.33333	6.616	5.61644
YGL129C	10.828	9.8764	5.83333	4.74265
YGL131C	10.1008	8.44068	6.14286	5.10127
YGL132W	9.99029	8.00806	5.60256	5.17791
YGL133W	9.481	8.94783	6.28369	5.44444
YGL135W	10.408	10.6103	4.38889	4.32231
YGL136C	10.805	10.9	6.26667	5.11734
YGL138C	8.24803	10.7889	4.88088	4.29557
YGL139W	8.98585	7.10475	5.44785	4.77931
YGL140C	8.88038	5.95808	6.84382	4.62903
YGL143C	10.1	10.0109	5.46847	2.60714
YGL144C	10.841	10.1005	7.28829	5.50675
YGL146C	8.88832	6.91054	6.04729	4.75143
YGL147C	9.24545	10.4611	5.58841	4.31148
YGL148W	8.8	10.679	3.84858	2.37019
YGL149W	9.28101	10.3854	4.68729	4.05769
YGL151W	8.84106	6.26875	4.68717	3.46476
YGL152C	8.84889	6.38311	5.64868	4.77273
YGL153W	8.98885	7.10108	5.42683	4.72043
YGL154C	8.53106	7.048	4.55686	3.63402
YGL156W	9.82841	10.651	7.88678	5.91724
YGL157W	8.53888	7.01003	5.77632	4.625
YGL158W	9.34488	7.101	5.62883	5.14771
YGL159W	9.92891	8.49565	5.68153	4.75792
YGL160W	10.8294	10.4011	7.62838	4.77222
YGL161C	8.0825	10.0976	8.18626	4.79557
YGL162W	9.8858	9.33645	5.88158	4.72571
YGL163C	10.4888	10.8371	6.82301	4.60667
YGL164C	8.28004	8.89941	6.44444	4.75955
YGL165C	9.48835	9.10741	6.58258	5.2426
YGL166W	10.3838	10.8461	7.44737	5.6755
YGL167C	10.832	10.5309	3.47573	2.77722
YGL168W	10.388	10.1098	3.87736	3.11537
YGL170C	8.41085	6.88731	6.42857	5.34969
YGL173C	10.531	10.2911	4.18261	4.07333
YGL174W	10.494	10.101	6.65263	5.04605
YGL175C	8.385	7.91	7.28088	5.29375
YGL176C	9.80951	8.79464	6.88889	4.62903
YGL177W	8.85108	7.10391	6.22685	5.35329
YGL179C	10.1	10.1048	7.26279	5.22279
YGL180W	10.399	10.375	7.85455	5.37509
YGL181W	8.28841	8.64348	5.62745	4.7052
YKL096W	9.32843	7.76	7.51725	5.52766
YKL097C	9.83109	7.10741	7.38584	5.64474
YKL098W	9.51029	8.00826	4.16667	3.45205
YKL100C	8.81004	8.99091	7.73043	5.9404
YKL101W	9.82	9.101	7.16529	6.75496
YKL102C	9.33828	8.10744	8.06848	5.74767
YKL103C	9.85849	8.4569	8.02739	6.41007
YKL105C	9.10455	8.36975	7.08655	6.07744
YKL106W	9.83481	7.41005	5.84631	5.90779
YKL107W	10.5859	7.53077	6.87682	6.00675
YKL109W	9.88889	8.081	7.76522	5.97973
YKL110C	10.53	9.10311	7.08821	6.5037
YKL113C	10.8989	10.9059	7.42	5.76744
YKL114C	10.81	10.8933	7.53465	3.4372
YKL116C	10.108	9.50485	6.84	6.5747
YKL117W	10.1009	9.10511	6.80768	6.70468
YKL118W	8.52439	8.41045	2.84231	2.26316
YKL119C	10.088	9.05881	7.07767	5.60714
YKL120W	10.889	9.854	7.1875	5.65375
YKL121W	9.05108	7.29411	8.02247	6.00667
YKL123W	9.08828	6.84108	7.88889	6.32624
YKL124W	8.01083	8.008	7.18582	5.71935
YKL126W	10.4888	9.10408	5.86865	3.79394
YKL127W	10.0095	8.75893	6.08586	6.36296
YKL128C	9.85981	9.07407	5.86089	6.36296
YKL129C	9.10544	8.40678	6.24286	6.49265
YKL130C	8.29109	8.09091	6.76562	5.97639
YKL131W	9.88089	8.00826	8.33862	5.74247
YKL132C	8.08808	7.70866	8.78879	5.36306
YKL133C	9.1051	7.10565	8.20833	6.07473
YKL134C	10.589	10.3105	8.54023	5.62903
YKL135C	8.25109	6.94326	8.82828	5.47701
YKL136W	10.443	8.01008	6.81835	5.0775
YKL137W	8.89911	8.105	6.74046	5.33544
YKL138C	10.8581	8.01026	5.48079	6.19747
YKL140W	9.94393	8.88288	7.35484	6.39231
YKL142W	8.08504	8.41026	7.03868	6.24718
YKL143W	8.105	6.42667	7.88889	5.59747
YKL146W	9.898	6.46053	8.06306	5.77746
YKL147C	8.889	6.8069	6.82869	5.09714
YKL148C	8.828	8.29411	6.83651	5.70921
YKL149C	8.10105	8.32773	6.84615	5.77746
YKL150W	8.38298	7.1095	6.41788	5.5375
YKL151C	9.81085	8.10656	6.01714	5.35337
YKL155C	10.3511	9.30851	8.16667	5.99177
YKL156W	8.82809	7.91003	7.50847	5.77755
YKL157W	9.5	8.10475	8.87629	6.71395
YKL158W	10.29	8.10529	8.3617	6.62406
YKL159C	8.91009	7.4697	7.70175	6.2518
YKL160W	9.4281	9.57547	8.57282	6.79678
YKL161C	8.93548	7.44697	6.60802	5.69677
YKL162C	9.80855	8.32773	8.58484	6.51145
YKL163W	9.33981	7.10978	7.2314	6.53373
YKL164C	9.84101	8.09836	8.32282	6.22901
YKL166C	8.81081	7.47059	5.85517	5.7415
YKL167C	9.84848	6.74453	6.88386	5.9579
YKL168C	8.89531	7.736	8.37736	5.76158
YKL169C	10.0311	10.7311	5.5	6.11321
YKL170W	10.8298	9.88043	8.58574	6.06797
YKL171W	9.84906	7.88611	8.47525	6.36957
YKL174C	8.5901	7.77778	6.33088	5.73674
YKL175W	9.41009	8.4569	6.08633	5.92754
YKL176C	10.0455	8.06611	8.33645	6.63766
YKL179C	8.52991	6.54861	7.88048	5.70513
YKL183W	8.43898	7.43609	7.35833	6.27671
YKL184W	8.91006	6.83673	5.86089	4.93711
YKL185W	8.29411	7.75591	7.03149	6.01333
YKL187C	8.80105	8.07377	7.18852	6.17621
YKL188C	8.42858	7.968	7.31667	6.17931
YKL190W	10.443	10.0108	5.64356	2.25243
YGR027C	9.84394	6.10308	8.88889	5.16071
YGR031W	9.28105	9.60107	6.88219	5.30233
YGR033C	8.81089	9.5961	8.72083	6.27757
YGR034W	9.35381	10.2653	8.32584	5.76755
YGR035C	8.28949	8.57391	8.46726	6.00658
YGR036C	9.10831	7.64646	3.2438	2.61404
YGR037C	10.3103	10.8846	8.65672	6.01
YGR039W	9.9881	5.81057	7.5	5.25277
YGR041W	8.3545	8.351	8.16216	5.99346
YGR042W	10.4841	10.1039	8.70385	7.25773
YGR043C	9.88889	10.3478	8.48315	7.32038
YGR044C	9.41006	8.10073	8.5	5.77125
YGR045C	9.84311	10.2533	8.54023	7.16528
YGR049W	10.3049	10.9643	8.37875	7.95652
YGR051C	8.92893	7.875	8.03488	6.44366
YGR052W	9.54105	10.1075	8.25333	7.74404
YGR054W	8.40833	10.9101	8.45235	7.34146
YGR055W	8.325	8.591	8.28629	6.74265
YGR056W	9.48311	10.3929	6.625	4.70165
YGR057C	9.31086	9.08257	8.60852	6.40278
YGR058W	10.3581	10.3451	7.88866	6.75221
YGR059W	10.8	10.761	8.78268	7.96226
YGR061C	10.1044	10.6663	6.50667	6.77419
YGR062C	10.1054	10.8868	8.30435	7.74694
YGR064W	9.42453	10.7377	8.28851	6.74227
YGR066C	8.88103	10.6451	8.85815	7.27735
YGR067C	8.88089	10.8441	8.15854	7.73451
YGR068C	8.88286	6.49677	6.76336	5.14757
YGR069W	8.10288	5.68	5.86644	5.39024
YGR070W	10.9481	10.1029	8.22785	7.02419
YGR071C	10.8286	10.9411	6.82857	6.91954
YGR072W	10.8344	9.77	8.38554	6.55556
YGR076C	10.9105	9.625	8.53261	6.97347
YGR077C	10.2854	10.7104	8.22222	6.21772
YGR078C	9.24881	10.9831	6.78452	6.37624
YGR079W	9.10293	8.47009	7.03837	6.01977
YGR080W	10.8099	8.51001	7.05469	6.73771
YGR081C	10.8844	10.051	7.82583	6.51537
YGR084C	10.8844	10.4108	8.33735	6.27778
YGR085C	10.4888	10.2424	7.78571	6.29907
YGR087C	10.401	9.10953	8.45263	7.75
YGR088W	10.0895	10.5109	8.83562	7.17635
YGR096W	9.58831	10.6508	8.88085	7.775
YGR097W	8.41025	8.40101	8.27368	6.24658
YGR100W	10.4511	10.5746	8.58025	7.0303
YGR101W	10.1051	10.1097	8.64634	7.53126
YGR102C	10.9109	10.7538	8.25609	7.93137
YGR104C	9.98908	10.2667	7.26042	5.56604
YGR105W	8.88841	9.77333	2.31481	2.05714
YGR107W	10.8859	10.61	8.14815	7.61457
YGR108W	8.9	10.8667	8.68765	7.23276
YGR109C	9.81006	10.4557	8.83802	7.26729
YGR111W	8.38108	7.10108	7.58475	5.37095
YGR112W	9.88848	10.5345	8.86703	7.30926
YGR118W	9.08985	10.2424	6.50376	6.57143
YGR121C	10.0946	10.8495	8.02877	6.74627
YGR122W	8.81029	6.42767	6.42857	5.00529
YAL068C	9.10888	8.49108	7.42345	6.35375
YAL067C	9.5598	7.91	7.80808	5.47576
YAL066W	8.08333	7.8109	6.02187	6.14493
YAL065C	8.88883	8.33898	6.08886	6.33333
YAL062W	8.8081	8.35897	6.53436	6.27612
YAL061W	8.80294	8.1077	6.8	6.3
YAL060W	8.49835	8.4108	7.76577	6.62791
YAL059W	8.58955	9.09259	7.84258	6.31298
YAL058W	8.98388	7.39101	6.38384	6.1037
YAL056W	8.24108	8.58095	6.34483	5.75366
YAL055W	9.28889	9.10101	7.05738	7.34177
YAL053W	8.2439	7.95101	5.85775	6.4
YAL051W	8.49109	8.49108	6.8	7.27571
YAL049C	8.5	8.56897	6.21429	6.60156
YAL048C	9.10511	9.95876	7.2	6.76555
YAL046C	8.28106	9.37736	7.34746	6.97305
YAL045C	8.33809	9.40951	6.88	6.7771
YAL044C	9.04588	9.07547	6.83479	7.23477
YAL042W	8.44526	8.49103	7.80808	6.67227
YAL043C-a	8.525	7.76744	8.02877	6.53719
YAL040C	8.88108	8.10924	6.50768	7.37391
YAL039C	10.4109	8.9711	6.35659	6.7676
YAL037W	8.38333	8	5.75817	6.46775
YAL036C	8.10311	8.67544	6.5037	6.57257
YAL035W	10.8493	10.3109	7.80808	5.70207
YAL034C	8.28829	8.8481	8.88085	7.32174
YAL031C	8.35981	8.76991	8.27368	6.94355
YAL030W	8.08899	7.71075	8.58025	6.66929
YAL029C	8.10905	7.51039	8.64634	6.41221
YAL028W	9.10101	8.76991	8.25609	5.24576
YAL027W	8.88103	8.65487	7.21488	6.67707
YAL026C	9.10081	8.93107	6.34483	5.47656
YAL023C	10.8939	9.54348	6.36364	3.10092
YAL022C	8.88841	7.60901	6.85876	5.15067
YAL021C	8.88891	9.83108	4.62857	3.06944
YAL020C	8.84981	8.5691	7.80808	6.0625
YAL019W	8.8855	8.63846	7.35375	6.57447
YAL018C	8.88483	8.74324	6.58587	6.14675
YAL017W	8.81099	7.04107	6.84739	6.07463
YAL015C	8.35294	7.49101	6.88759	5.42063
YAL014C	8.35251	7.63359	6.86486	6.57537
YAL013W	8.1	9.33333	6.84835	6.21311
YAL011W	9.84486	10.4841	6.83584	6.76752
YAL010C	10.1009	10.0241	7.01818	6.9619
YAL009W	8.90109	9.10963	7.35235	6.52212
YAL008W	8.00881	9.60577	7.03472	6.43535
YAL007C	8.9101	8.05645	7.34523	6.7374
YAL004W	8.29839	8.10355	7.83452	6.72767
YAL005C	8.8101	7.84375	7.43535	6.36496
YAL002W	8.88086	9.39604	6.34535	5.47673
YAR002W	9.10811	9.74	6.43535	6.03452
YAR003W	8.10101	9.39785	7.23554	6.22017
YAR014C	8.10841	8	7.52536	6.34146
YAR015W	8.88544	9.33981	7.83445	6.51776
YAR018C	8.93108	7.10669	7.52353	6.70766
YAR020C	8.44539	8.55102	7.43235	6.32331
YAR023C	8.2801	7.40299	7.32355	6.04348
YAR027W	8.95881	8.09836	6.82345	6.35294
YAR028W	8.9589	7.80311	4.84286	5.20763
YAR029W	8.48899	7.10109	7.75275	6.17247
YAR031W	8.84109	7.60305	7.03253	6.66929
YAR030C	8.88104	7.10475	7.18823	6.30147
YAR035W	8.2895	7.9107	7.85475	6.42424
YAR037W	8.38109	7.67691	7.80556	6.12593
YAR040C	8.10885	7.5303	7.48738	6.25
YAR042W	8.88588	7.73077	7.65078	6.17266
YAR043C	8.95102	8.50847	7.88764	6.10072
YAR044W	8.01053	8.59829	7	6.02797
YAR047C	8.28395	8.92793	7.23636	6.44753
YJL218W	9.28804	8.032	8.87615	6.67647
YJL217W	8.88288	7.10978	6.87803	6.19444
YJL216C	8.99108	7.75781	7.72873	6.16364
YJL215C	8.39496	7.49242	7.82857	6.9702
YJL214W	8.85101	6.95804	7.15	6.42991
YJL212C	9.08036	8.58261	6.82859	6.72946
YJL210W	10.1088	9.00901	7.17742	6.93547
YJL211C	9.81005	7.88	7.2438	7.64407
YJL209W	10.8105	10	8.8172	6.76364
YJL208C	10.0893	8.61069	7.85488	6.65347
YJL207C	9.48101	7.88109	7.34454	6.17172
YJL206C-A	9.10393	7.99106	8.58261	6.4476
YJL204C	10.859	10.0667	6.14884	6.125
YJL201W	9	7.87931	6.42742	6.31673
YJL199C	8.9581	8.88496	7.04839	6.70297
YJL198W	9.81005	9.01086	7.5	6.9902
YJL197W	8.88896	8.55556	6.71869	7.7913
YJL193W	9.81088	8.9633	7.00862	6.13592
YJL192C	9.48544	8.65766	7.36036	6.47367
YJL190C	8.102	7.65385	8.05455	6.24742
YJL188C	10.5825	10.1099	5.16864	4.36957
YJL187C	10.2525	8.78761	7.18835	6.64573
YJL186W	9.88289	8.89109	7.73504	6.41479
YJL185C	9.8101	8.38739	7.85702	6.13674
YJL183W	10.8081	10.3409	5.40584	5.27273
YJL181W	8.01044	6.66105	6.62044	5.35175
YJL182C	10.5311	8.54701	7.81882	6.76768
YJL180C	10.8986	10.1008	7.04444	7.59302
YJL179W	10.5883	9.28704	7.40541	6.39175
YJL178C	8.98388	8.76991	8.83673	6.05155
YJL176C	10.3902	10.5455	7.61429	1.76119
YJL171C	8.9845	6.6451	6.27872	5.63477
YJL170C	8.35246	6.89796	6.80469	6.23364
YJL169W	8.58485	7.5	6.88876	7.93333
YJL168C	8.83249	7.80311	7.25281	6.47959
YJL166W	10.841	9.00935	7.68444	6.43617
YJL164C	9.10838	8.29411	6.33186	5.1711
YJL162C	8.88959	8.6087	6.78626	6.67421
YJL159W	8.55931	8.1001	6.42308	7.57
YJL158C	8.38843	7.69101	6.7885	6.15741
YJL157C	9.0981	8.78261	6.80342	6.17692
YJL155C	8.50435	9.00935	5.50833	5.24234
YJL154C	8.10088	8.0931	6.44275	5.17593
YJL153C	8.08955	7.57258	6.62205	5.36441
YJL152W	8.1	8.34454	6.86552	5.41379
YJL150W	8.94488	8.91091	6.88853	5.91737
YJL149W	8.31009	8.05691	6.36857	5.27723
YJL148W	8.38805	9.01001	7.58231	5.63265
YJL147C	8.2811	7.89683	6.37689	5.46667
YJL146W	8.10858	7.46611	6.03448	6.54701
YJL145W	8.80449	8.10033	6.58209	6.22936
YJL144W	8.1081	8.91091	6.77778	6.32423
YJL142C	8.8891	8.71004	6.2685	5.73477
YJL138C	8.08	7.95101	6.17606	6.96094
YJL135W	8.58511	6.71011	6.885	6.15447
YJL134W	8.84806	6.88435	6	5.59711
YJL133W	8.88511	7.40876	6.04027	5.73761
YJL132W	8.53888	7.10077	6.84167	5.29738
YJL131C	8.89109	7.75104	7.34535	5.14961
YJL130C	8.81005	8.39669	7.86552	7.69748
YKR087C	10.3109	8.30508	7.87873	5.99777
YKR088C	9.89899	8.60107	7.61847	5.99306
YKR089C	10.0101	8.42735	8.8037	6.04027
YKR090W	10.3103	9.55881	8.71717	6.51111
YKR091W	10.8841	9.89899	8.68627	6.03401
YKR092C	10.1088	10.081	7.82407	5.72394
YKR093W	10.8084	9.76	7.67257	6.25714
YKR097W	10.5058	9.5	7.61635	6.22535
YKR098C	10.0501	9.80108	8.38623	6.76047
YKR099W	10.891	9.10101	7.08475	5.73203
YKR100C	10.4559	10.0825	8.76823	7.4
YKR101W	10.8488	10.1071	8.20619	6.79379
YKR103W	10.8881	9.74257	8.28474	6.17606
YKR104W	10.8801	9.46667	8.88	6.15278
YKR105C	10.1084	10.8911	8.46237	6.52238
YLL018C-A	10.5085	10.8784	8.58551	7.01735
YLR262C-A	10.2424	10.5638	8.42453	6.29077
YLR422W	10.2838	8.61069	8.78085	6.55147
YLR423C	10.8105	10.4074	8.68538	6.56637
YLR425W	10.1008	10.6809	8.14286	5.5
YLR426W	10.105	10.8049	7.28826	6.97276
YLR427W	10.9341	8.98105	7.45378	5.70722
YLR428C	10.288	8.58261	7.83186	5.69078
YLR429W	10.288	10.641	8.60784	5.77966
YLR431C	10.9101	10.0825	8.66667	6.13669
YLR432W	10.0101	9.26108	7.97759	5.73154
YLR433C	9.58281	9.7	7.76316	6.01398
YLR434C	10.9881	10.5531	8.38678	7.06299
YLR435W	10.4286	10.3788	6.67808	5.17557
YLR436C	10.1086	10.7927	8.86364	6.67467
YLR438W	10.4883	9.10626	5.75472	6.06757
YLR441C	10.2839	10.6533	8.88785	5.62068
YLR443W	10.4859	9.02751	6.41441	5.2971
YLR444C	10.8311	9.88109	7.58761	5.53275
YLR445W	9.91089	8.50435	7.35772	6.01333
YLR446W	9.9899	8.70536	7.48167	6.30272
YLR447C	10.8381	9.4	5.85567	4.73333
YLR448W	10.8095	9.31029	6.73384	4.74091
YLR449W	9.9899	7.5	6.56834	5.70253
YLR450W	10.8849	8.70909	6.83701	6.07333
YLR452C	10.0889	9.48544	7.88871	6.07219
YLR453C	9.80108	8.93636	7.86843	5.95946
YLR454W	9.81088	9.0841	7.50427	5.71779
YLR456W	9.81008	9.25471	7.68834	5.95973
YLR460C	10.8581	9.25471	8.73267	6.96
YLR461W	10.8436	10.3936	8.63333	7.09917
YML009C	10.026	9.02778	7.2438	6.64179
YML010C-B	10.8241	10.2424	7.3625	6.19417
YML021C	10.2909	9.69388	7.84404	5.47576
YML081C-A	10.35	10.1034	8.76768	6.72308
YMR060C	10.8889	10.7027	8.30337	6.11667
YMR158C-B	9.89903	8.98105	8.00801	6.21731
YMR169C	9.31085	8.9	7.75883	5.76721
YMR174C	8.8	8.46551	7.47458	5.73221
YMR175W	10.3333	9.3591	7.18803	5.99296
YMR194C-A	10.8351	8.75455	8.28037	6.69767
YMR326C	10.3411	9.10981	8.43617	6.756
YNR032C-A	10.8581	8.98108	8.8037	6.91338
YNR050C	10.5088	8.77885	8.05051	6.53719
YNR051C	10.109	10.1028	6.73737	5.06557
YNR056C	9.4	8.89091	7.70786	5.73673
YNR057C	9.01001	8.3931	7.28765	5.69677
YNR058W	10.3511	8.10667	7.77418	6.96094
YNR059W	10.8891	9.10101	8.01802	6.91473
YNR060W	10.1085	8.62831	7.88383	7.03226
YNR061C	10.2899	8.67544	7.62383	6.77626
YNR062C	10.0556	8.41026	7.86885	7.00777
YNR063W	10.988	8.29661	7.54745	6.71679
YNR064C	10.8109	10.5657	7.63818	6.29738
YNR065C	10.8588	10.4545	7.56731	5.77636
YNR066C	10.1029	8.50435	6.08689	5.71242
YNR067C	9.4581	8.1	7.80351	6.5597
YNR068C	10.4839	9.10364	6.84262	4.72394
YER014C-A	10.4	9.93548	7.47864	5.00777
YER016W	10	10.3298	7.50877	6.75714
YER017C	10.4805	10.284	5.48485	4.72477
YER019W	10.5881	10.6026	8.21569	6.76325
YER019C-A	8.31088	9.80108	6.81889	6.59558
YER020W	8.85584	9.10389	6.68466	6.55
YER024W	8.98104	9.10103	8.18876	6.37571
YER030W	8.48988	9.70476	8.85385	6.77778
YER032W	9.88892	10.7789	8.15315	7.40323
YER033C	10.2411	10.6106	7.80808	6.72353
YER034W	10.8831	10.4607	8.44339	7.67797
YER038W-A	8.82906	10.101	6.87674	6.64964
YER039C	10.4889	10.0711	8.28008	7.21137
YER040W	10.8889	10.1061	8.41758	7.72292
YER041W	8.1081	9.40385	6.67869	5.67153
YER042W	8.8855	8.90265	7.87512	6.37324
YER044C	10.891	4.7391	1.84146	1.35556
YER044C-A	10.5	10.6628	8.53846	7.69565
YER045C	10.0888	10.6091	7.78847	6.71212
YER046W-A	9.3101	10.734	7.25387	6.37097
YER047C	9.30831	10.9109	7.60833	6.65733
YER048C	8.88391	10.3646	6.70768	3.79528
YER049W	9.10109	10.4375	7.22764	6.93746
YER050C	10.8444	10.7625	7.87037	7.57795
YER051W	8.03105	9.37037	7.05589	6.79379
YER052C	8.45105	9.10098	7.48765	6.67164
YER053C	8.3881	9.88461	7.07837	7.53772
YER054C	10.4088	10.1077	7.52727	6.0614
YER055C	10.4101	10.8846	8.40187	7.46271
YER056C	10.3856	10.5658	8.34286	7.47058
YER056C-A	10.2838	10.4429	7.40187	6.73494
YER057C	8.41004	9.02727	7.80816	6.39007
YER058W	8.55358	9.93548	6.25181	4.77023
YER059W	8.85	10.2551	6.48528	5.95035
YER060W	8.88411	8.83036	7.28168	6.33333
YER060W-A	8.825	8.7391	7.21528	6.17621
YER061C	10.1085	10.9294	7.70808	7.5
YER062C	8.3109	8.70435	7.44203	6.66176
YER065C	9.8101	10.7849	7.82764	7.47333
YER066C-A	8.81003	10.9565	7.86446	6.97656
YER067W	8.85109	9.55108	7.18444	6.45968
YER067C-A	8.88899	10.1039	8.01562	7.0677
YER068W	10.0333	2.5	7.17204	1.72756
YER068C-A	8.90435	10.1061	7.01688	6.17699
YER069W	8.53333	9.81073	7.78069	6.99218
YER070W	1.3101	1.10043	1.58821	1.26966
YER071C	8.59854	9.4101	7.26429	6.77778
YER072W	10.3333	10.0556	8.64356	7.64348
YER073W	9.88355	10.8387	8.28088	7.57973
YER074W	10.8811	10.5753	7.57868	7.26548
YER075C	8.8489	10.1058	8.08387	7.39344
YER079W	9.1041	9.67961	8.86259	7.277
YER080W	8.58558	9.41005	8.35806	6.79313
YER081W	9.93104	10.8588	7.44248	6.55714
YER083C	10.8288	10.7109	4.37778	3.42
YER084W	10.8105	10.747	8.31776	7.07107
YER085C	9.59259	10.7527	7.38333	6.73333
YER086W	8.10924	7.83333	1.68782	1.47544
YER087C-A	10.8105	10.6835	8.18519	7.13492
YIL001W	8.108	8.945	8.835	7.579
YIL002C	9.38884	10.427	8.17526	5.66
YIL005W	9.83505	10.0978	8.27723	5.73774
YIL011W	8.55906	10.575	7.85149	5
YIL012W	8.88259	9.69791	7.01667	4.79777
YIL013C	10.106	10.1034	8.63158	5.90541
YIL014W	8.90991	10.4286	8.17476	5.9579
YIL015W	9.0389	10.4101	8.75263	6.37406
YIL016W	8.8491	10.5345	8.68048	5.96598
YIL017C	9.04811	10.5245	7.87273	5.73756
YIL020C	8.89029	10.2436	7.8	6.11972
YIL023C	8.93459	10.8811	7.38604	6.16057
YIL024C	9.52941	10.8025	8.80859	6.27143
YIL025C	8.55852	10.907	8.30682	6.24276
YIL027C	8.98333	10.8101	7.84158	5.77778
YIL028W	9.34951	10.8488	8.44231	5.79765
YIL029C	8.33333	10.3864	7.71681	5.41357
YIL032C	9.08548	10.5946	7.60184	6.36364
YIL034C	8.804	10.9101	7.58333	5.91034
YIL035C	9.3451	10.7011	7.57844	4.49367
YIL036W	10.3103	10.0107	8.30768	7.04274
YIL037C	8.88109	10.8276	8.47475	5.97611
YIL039W	8.88826	10.6291	8.58406	5.76713
YIL040W	9.42858	10.9367	8.68086	6.51128
YIL041W	9.02804	9.24242	7.85586	5.55346
YIL043C	9.94101	10.6806	6.81488	5.45736
YIL044C	8.10924	10.9351	7.48864	6.75397
YIL045W	8.82859	10.6849	8.86843	6.51537
YIL049W	8.35808	8.89611	7.38474	5.47125
YIL050W	8.10333	9.8841	8.44762	7.22917
YIL053W	8.51044	10.01	8.17583	5.56962
YIL057C	8.49108	10.6438	6.04	6.14159
YIL064W	8.81048	9.90526	8.38423	6.03497
YIL065C	8.88889	10.2683	8.08574	6.94355
YIL072W	9.08548	10.086	8.08586	6.07576
YIL073C	8.90984	10.1028	7.75238	6.09722
YIL076W	9.41009	10.3293	8.76289	6.54135
YIL077C	9.31089	10.0366	8.58586	6.10563
YIL079C	9.59859	10.3827	8.04	5.75716
YIL084C	9.90081	10.4465	8.85822	7.35294
YIL086C	9.89	10.3735	8.80842	5.33333
YIL087C	8.41039	10.086	8.03704	6.11706
YIL088C	8.10889	10.1051	8.1618	6.13793
YIL090W	9.58948	10.0746	6.78261	4.53906
YIL093C	10.3289	10.0938	7.83478	6.92174
YIL095W	9.83099	10.2763	7.43636	6.92126
YIL096C	9.48104	10.291	7.8617	7.04464
YIL097W	10.82	8.81	8.782	3.416
YCL001W	10.4101	10.9481	7.45683	6.30952
YCL002C	10.0338	10.5663	8.82653	5.74247
YCL005W	10.101	10.7041	8.88157	6.22314
YCL006C	10.5083	10.8765	8.58427	6.52518
YCL007C	10.2941	9.10493	2.03158	1.26724
YCL008C	10.9833	10.7037	8.78847	5.67977
YCL009C	10.2593	10.0911	8.53261	6.06757
YCL010C	10.8508	10.8441	7.42308	5.63063
YCL011C	10.9109	9.69307	8.07216	5.73746
YCL012W	10.4888	10.4891	8.80188	6.94615
YCL013W	10.8086	10.8108	8.42553	6.7197
YCL014W	10.3386	10.671	8.70787	7
YCL016C	10.4091	10.3676	8.38853	5.77034
YCL023C	10.4324	10.2757	8.23535	7.04615
YCL024W	10.891	10.2907	8.35235	6.60145
YCL025C	10.1089	10.1009	8.35345	6.42553
YCL026C	10.2903	10.5104	8.81	6.97413
YCL027W	10.3488	10.494	8.35352	6.9375
YCL028W	10.101	10.4107	8.53452	7.07264
YCL029C	10.825	10.5263	8.44325	7.11667
YCL030C	10.1003	10.8696	8.34523	7.23452
YCL032W	10.8951	10.1005	8.68048	6.77099
YCL033C	10.8883	10.6875	8.82828	6.7755
YCL034W	10.4535	10.9494	8.38828	6.27465
YCL036W	10.4849	10.771	8.04348	6.16912
YCL037C	10.2903	10.1071	5.86278	3.91603
YCL039W	10.4588	10.9625	8.38785	5.69403
YCL040W	10.8584	10.771	8.83146	6.1371
YCL042W	10.8895	10.6841	8.48043	7.39737
YCL044C	10.4353	10.4675	8.47	6.20144
YCL045C	10.1085	10.0959	7.66888	6.67717
YCL046W	10.2941	10.1069	6.48859	4.00943
YCL047C	10.1084	10.0959	8.77273	6.95375
YCL048W	10.9858	10.5263	8.64773	6.46428
YCL049C	10.9103	10.0274	8.75281	6.35
YCL050C	10.2	10.2637	8.08418	5.44753
YCL051W	10.8444	10.6341	8.27273	6.54615
YCL055W	10.0244	10.481	5.26823	4.97436
YCL056C	10.2538	10.4699	8.38085	6.40745
YCL057W	10.5289	10.5385	7.4	6.04667
YCL060C	10.1008	10.7765	8.36419	5.63636
YCL061C	10.8899	10.3254	8.25482	5.91391
YCL062W	10.0109	10.9333	8.05642	7.30645
YCL063W	10.1099	10.1011	8.38459	6.7771
YCL064C	10.8436	10.1011	8.35864	7.176
YCL069W	10.3388	10.0959	8.81753	7.0155
YCR001W	10.4051	10.3766	8.86869	6.92063
YCR002C	10.8459	10.9107	4.81463	3.64762
YCR003W	10.4828	10.3276	6.485	4.13333
YCR004C	10.5088	10.941	8.68478	7.04777
YCR005C	10.5458	10.6377	8.58242	7.74675
YCR006C	10.1088	10.338	8.18847	6.66667
YCR007C	10.8028	10.7432	8.24285	6.73913
YCR008W	10.4444	10.2727	8.82828	7.2377
YCR009C	10.8105	10.0311	5.68882	3.90974
YCR010C	10.101	10.5067	8.34043	6.75496
YCR011C	10.0411	10.6533	8.83083	6.50746
YCR014C	10.4109	10.0811	8.74509	6.69767
YCR015C	10.5443	10.0811	8.76471	6.77768
YCR016W	10.8581	10.6571	8.54646	6.13636
YCR017C	10.8845	10.2576	8.52688	5.96
YCR019W	10.1059	10.5405	8.08375	6.37518
YCR020C	10.5105	10.5488	8.58223	6.66176
YCR020C-A	10.3089	10.5857	8.08163	6.74733
YCR021C	10.8441	10.5526	8.38623	6.5
YCR022C	10.3388	10.1054	8.28008	6.17123
YCR023C	10.8101	10.0971	8.08081	6.55772
YDL096C	10.1028	10.8888	8.31815	7.02459
YDL099W	10.3811	10.2535	8.56075	6.52593
YDL100C	10.3455	10.9836	6.82559	4.97246
YDL101C	10.8353	10.0281	8.65217	7.27714
YDL104C	10.358	10.4565	7.80869	6.95161
YDL106C	10.4105	10.5465	8.07143	4.79646
YDL107W	10.0435	10.1011	7.3388	6.29507
YDL110C	10.981	10.7403	6.74184	4.72946
YDL112W	10.1089	10.5938	8.20431	7.00762
YDL113C	10.9494	9.68269	8.14851	6.76776
YDL114W	10.0105	9.33028	8.38889	6.64276
YDL115C	10.3581	10.9677	4.82559	2.66337
YDL116W	10.5101	10.9057	3.57143	2.41757
YDL117W	10.0411	10.0411	8.40244	7.65168
YDL118W	10.5089	10.4857	7.14851	6.27713
YDL119C	9.38931	9.09511	7.86275	5.19417
YDL121C	10.0848	10.9333	8.56818	6.77778
YDL122W	10.1005	10.1001	8.87527	6.17391
YDL123W	10.8881	10.9446	8.62745	6.97214
YDL124W	10.5431	10.1071	8.80816	6.44615
YDL125C	10.8103	10.398	8.05309	6.06122
YDL127W	10.8589	10.5107	7.55832	7.05775
YDL128W	10.1059	10.3788	7.4	7.67142
YDL129W	10.841	10.4341	7.36364	6.75714
YDL130W	10.5889	10.9108	5.07377	4.7094
YDL131W	10.9881	10.4571	7.74775	6.91736
YDL133W	10.8333	10.0109	5.68354	4.12121
YDL134C	10.3939	10.2759	8.52326	7.39573
YDL134C-A	10.8809	10.101	8.46078	6.67421
YDL135C	10.9881	10.7656	8.21875	6.92
YDL136W	10.8388	10.1	6.18802	4.71061
YDL137W	10.3289	7.3	7.33051	6.39167
YDL138W	10.481	10.2857	8.5	7.2
YDL142C	1.101	1.41067	1.37079	1.17925
YDL144C	10.4444	10.8644	8.85876	7.17094
YDL146W	10.5081	10.1007	8.42056	7.00917
YDL149W	10.4809	10.734	7.38167	6.79344
YDL151C	10.4556	8.97436	6.63265	4.67768
YDL154W	10.8289	10.5574	7.02614	6.71318
YDL155W	10.0411	10.7761	8.73883	7.70357
YDL156W	10.5485	10.0455	8.84375	7.62777
YDL157C	10.8101	10.7288	8.66667	7.29797
YDL160C	10.5556	10.2809	6.80768	3.41935
YDL161W	10.0108	8.51039	7.15574	7.24138
YDL162C	10.1099	10.381	6.81882	6.24576
YDL167C	10.0986	10.5753	8.18588	7.46747
YDL168W	10.5941	10.6667	8.0582	6.97246
YDL169C	10.2586	10.537	8.2234	6.62732
YDL170W	10.4581	10.5625	8.48832	6.73333
YDL171C	10.8106	10.5926	8.57282	7.24527
YDL172C	10.9531	10.2738	5.64151	5.31313
YDL173W	10.4411	10.7941	5.83386	5.07547
YDL174C	10.8101	9.93069	7.58848	6.21053
YDL175C	10.9883	10.1094	7.81562	7.22608
YDL176W	10.5802	10.931	7.68444	6.63115
YDL177C	10.253	10.61	7.52174	6.57758
YDL178W	10.1085	10.2456	7.08843	6.35778
YDL179W	10.9494	10.7691	8.18557	6.67742
YDL180W	10.901	10.1004	8.04386	6.91753
YDL182W	10.8543	10.7397	8.35514	6.26119
YDL183C	10.1086	10.629	6.01823	5.31092
YDL184C	10.8933	10.4536	7.88188	7.42478
YDL185W	10.981	10.1074	1.82282	1.49495
YDL186W	10.5459	10.101	8.08081	7.7156
YDL187C	10.5854	10.8889	8.20183	6.72441
YDL188C	10.5843	10.2576	8.51861	7.25438
YDL189W	10.3383	10.6611	7.68627	5.75156
YDL190C	10	10.0286	6.01459	6.72797
YOR001W	10.0981	10.7907	5.02222	4.73471
YOR002W	10.981	10.1	6.84536	5.04464
YOR003W	10.5885	10.2766	8.28863	6.76047
YOR005C	10.1028	10.0805	8.28245	7.71578
YOR006C	10.8853	10.0375	8.38889	7.46364
YOR007C	10.8895	10.5867	8.78723	7.05405
YOR008C	10.1029	10.671	1.88636	1.41667
YOR009W	10.2432	10.8511	8.46739	7.09708
YOR010C	10.25	10.4106	8.77778	7.47039
YOR011W	10.9333	10.6	8.58341	7.66337
YOR012W	10.2885	10.5526	8.84536	7.47475
YOR013W	10.1	9.84694	8.07143	6.44928
YOR014W	10.2839	10.8706	6.55056	5.00733
YOR015W	10.4105	10.5934	8.48019	7.64103
YOR016C	10.0583	10.9383	8.03333	7.61717
YOR017W	10.5853	10.1046	8.85788	7.26016
YOR018W	10.8051	10.3333	8.40426	6.74561
YOR019W	10.1051	10.973	8.36843	7.02459
YOR021C	10.3849	10.361	8.16082	7.60345
YOR022C	10.2533	10.9067	8.51648	7.77799
YOR023C	10.8481	10.361	6.15679	7.11537
YOR024W	10.3889	10.5733	8.4086	7.0371
YOR025W	10.81	9.29	8.88583	6.37778
YOR026W	10.5883	10.8889	5.07143	3.57391
YOR027W	10.4359	10.9411	7.36843	5.25974
YOR028C	10.101	10.101	8.68	6.93651
YOR029W	10.0109	10.7051	8.82759	7.95273
YOR030W	10.8895	10.3976	8.16327	6.775
YOR031W	10.301	10.3103	8.14737	6.99145
YOR032C	10.5984	10.52	8.28766	7.92593
YOR033C	10.5584	10.9103	8.32258	7.96396
YOR034C	10.2803	10.3684	8.46341	7.61261
YOR035C	8.08283	7.97959	2.86886	1.93257
YOR036W	10.101	10.4062	4.75648	2.76768
YOR037W	10.8849	10.1058	8.20833	7.2439
YOR038C	10.8089	10.701	7.77885	5.664
YOR039W	10.9439	10.9067	6.40217	5.51304
YOR040W	10.0103	10.3373	8.04167	6.79744
YOR041C	10.0103	10.3253	8.08308	6.77372
YOR042W	10.3291	10.6296	8.54845	7
YOR043W	10.9494	10	8.3	6.25954
YOR044W	10.4583	10.1094	8.76471	7.46296
YOR045W	10.8586	10.303	8.66216	7.40375
YOR047C	10.8406	10.7103	8.78571	7.25664
YOR049C	10.4948	9.69697	8.33019	6.57037
YOR050C	10.5591	10.3548	8.65686	6.07276
YOR051C	10.9385	10.1011	7.87368	5.22367
YOR052C	10.4101	10.271	7.30768	5.15779
YOR053W	9.9899	10.3297	8.68687	6.22143
YOR055W	10.9431	10.3846	8.38889	6.57065
YOR058C	10.888	10.4935	8.28474	7.71972
YOR059C	10.8103	10.7654	8.74444	7.2
YOR061W	10.101	10.0957	8.87838	6.73746
YOR062C	10.8848	10.3103	8.34375	6.77692
YOR064C	10.1059	10.5857	8.88655	6.90597
YOR065W	10.8911	10.1011	8.80323	6.9917
YOR066W	10.84	10.7838	8.21429	7.70175
YOR067C	10.5859	10.5455	6.86076	4.59091
YOR068C	10.4589	10.7738	5.20238	3.63477
YOR069W	10.0843	10.3924	5.75804	3.75762
YOR070C	10.4848	10.5651	7.46053	6.17094
YOR071C	10.8104	10.3461	8.08364	7.21667
YOR072W	10.8103	10.1057	8.86419	7.13445
YOR073W	10.0109	10.254	4.7438	2.94495
YOR076C	10.1099	10.5	7.46809	4.7771
YOR078W	10.5834	10.8088	5.82143	3.77973
YOR079C	10.831	10.8966	8.76667	6.61718
YOR080W	8.48945	7.78873	6.18588	3.97246
YOR081C	10.983	10.5811	8.22353	6.772
YOR082C	10.5289	10.8904	8.58628	6.79371
YOR083W	10.1094	10.8243	8.68889	6.67768
YOR084W	10.1049	10.681	8.85818	6.17606
YOR085W	10.241	10.8077	8.63818	6.10563
YOR086C	10.0889	10.8406	8.47872	7.024
YOR087W	10.5108	10.4026	8.83516	7.04762
YOR088W	10.9858	10.4101	8.61538	7.29167
YOR089C	10.1089	10.6456	4.72817	3.24218
YOR090C	10.0338	10.0897	8.82222	6.72308
YOR091W	10.1084	10.9333	8.46886	4.62308
YOR092W	10.8081	10.7375	8.48315	5.97518
YOR093C	10.8549	10.1074	8.67033	6.3037
YOR094W	10.9489	10.7838	8.83182	6.66116
YAR042W	10.1039	10.2609	8.72548	7.76742
YBL091C-A	10.8088	10.1001	8.62385	6.29276
YBL104C	10.825	10.5694	8.67583	7.52746
YBR074W	10.8291	10.7308	8.88889	7.09524
YBR098W	10.5506	10.5342	8.68882	5.97902
YBR122C	10.8403	10.4429	8.85859	7.50442
YBR157C	10.3299	10.8571	8.80852	7.60169
YBR201W	9.88551	10.5341	8.63829	6.74962
YBR230W-A	10.3299	10.0241	8.38345	7.77255
YCL002C	10.1085	10.8571	8.66667	7.17172
YCL012C	9.08854	10.2875	8.31	7.6
YCL014W	10.1088	10.1071	6.88057	6.55
YCL061C	10.0511	10.109	8.40688	6.73465
YCR061W	10.0104	10.1057	8.28526	7.21774
YDR318W	10.9054	10.2609	8.75281	7.42972
YDR475C	10.8902	10.7105	8.84158	7.2623
YER109C	10.8831	10.2763	8.88	7.71739
YFL031W	10.884	10.3108	7.61682	6.71395
YFL042C	10.3924	10.0109	8.25	7.13115
YFR045W	10.2881	10.2651	8.1875	7.9723
YGL033W	10.983	10.7083	6.82879	6.70476
YGL045W	10.1044	10.7424	8.43809	7.65712
YGL186C	10.4024	10.8095	6.86022	5.57143
YGR225W	10.1011	10.4811	8.87029	6.94531
YJL012C	10.3804	10.7397	8.22817	6.57647
YJL016W	9.25253	10.361	8.08278	6.29371
YJL020C	8.44444	10.5108	8.16843	6.7
YJL088W	9.08831	10.5443	8.28429	7.71671
YJL096W	10.1029	10	5.82879	6.96938
YJL160C	10.1093	10.2	8.16216	7.25
YJR060W	10.5541	10.1004	7.31815	5.9009
YJR085C	10.0345	10.9545	8.85859	7.45455
YJR101W	10.1083	10.5789	5.38235	5.71717
YJR112W-A	10.954	10.6411	8.34286	7.36066
YJR114W	10.8089	10.7059	6.83825	5.5625
YJR143C	9.95845	10.0308	8.86316	6.39695
YJR151C	9.34853	10.0101	8.30842	7.75965
YKL002W	9.3101	10.5634	8.80435	4.75401
YKL033W-A	9.885	10.3827	8.17273	7.35514
YKL157W	9.88889	10.1011	7.45378	5.73007
YKL198C	9.10301	10.0711	7.52881	5.76471
YKL201C	8.83394	10.7558	7.58605	6.27169
YKR054C	9.10881	10.7368	6.88431	6.39695
YKR100C	8.83831	10.9107	7.84545	5.77273
YLR054C	8.9811	10.7811	7.84737	6.00662
YLR194C	9.08831	10.311	7.35833	5.90779
YLR211C	8.10488	10.7558	8.22836	5.77013
YLR371W	10.1085	10.6957	5.86735	4.13793
YLR419W	10.1084	10.8731	7.88504	7.325
YLR445W	10.0345	10.3108	7.66087	7.06557
YML034W	10.481	10.091	8.78863	5.30772
YML104C	10.1089	10.987	7.2377	6.74242
YMR143W	10.5	10.6338	4.70755	4.23529
YMR202W	9.58044	10.8448	2.01852	2.14035
YMR269W	9.58	10.1039	5.46154	5.69912
YNL090W	9.85259	10.2469	7.88504	6.53676
YNL147W	10.3249	10.6269	8.61703	7.75175
YNL209W	10.931	10.3911	7.46823	6.36364
YNL280C	10.8109	10.4906	6.74419	4.75758
YNR052C	10.9288	10.9846	5.85263	3.73962
YOL048C	10.041	10.1067	7.51786	7.27714
YOL140W	9.82484	10.3625	7.04167	7.15702
YOL145C	10.2831	10.101	8.73809	7.59633
YOL154W	8.81089	10.6795	7.48828	6.27972
YOL164W	9.10101	10.1028	8.8	7.6036
YOR026W	9.10825	10.4648	5.80361	5.25714
YOR069W	9.38541	8.58511	7.4466	3.9376
YOR087W	10.9859	10.1084	8.84	7.71671
YOR239W	10.5824	10.7949	8.88216	7.39669
YOR298C-A	10.1084	10.6105	8.23423	7.30328
YPL165C	8.92453	10.9048	7.23577	7.76726
YPL249C-A	10.41	10.1027	7.32039	6.2605
YPL277C	8.81089	10.5811	8.14679	6.47551
YPR089W	8.35398	10.375	8.72277	7.10474
YPR098C	8.81008	10.3258	7.65833	6.04605
YPR141C	9.09434	10.811	8.81485	5.79762
YBR189W	10.3889	10.8308	5.56877	5.49123
YCR095C	10.358	10.1053	6.51685	5.53691
YCR102W-A	10.3293	10.61	8.28582	6.51064
YDL133C-A	10.1048	10.61	8.15857	5.26316
YDR058C	10.1084	10.4311	8.185	6.25
YDR174W	10.8438	10.3077	4.61728	3.50372
YDR202C	10.0381	10.4074	6.48765	3.75714
YDR205W	10.8105	10.4375	8.74184	6.50476
YDR445C	10.5455	10.2889	8.08481	5.73771
YDR537C	10.4109	10.9691	7.88825	6.9322
YFR039C	10.5085	10.8	7.87255	6.67116
YGL219C	10.3091	10.8301	8.08889	6.4434
YGR028W	10.8286	10.6571	8.85	7.20312
YGR032W	10.8884	10.5395	8.14843	7.95614
YGR038W	10.3944	10.081	8.75609	7.55738
YGR040W	10.1029	10.9109	8.28577	7.45968
YGR050C	10.0253	10.6591	8.63218	6.56255
YGR053C	10.58	10.7027	8.85876	7.10753
YGR063C	10.4109	10.2931	8.08586	7.77746
YGR086C	10.8983	10.3846	8.84889	7.01577
YGR089W	10.4545	10.9511	8.44286	5.54135
YGR092W	4.10101	5.10101	1.44777	1.63542
YGR093W	10.8885	10.3026	8.84186	6.74211
YGR106C	10.5556	10.5	8.05185	6.42747
YGR110W	10.9849	10.8904	8.28488	7.43702
YGR117C	10.5105	10.6375	8.88871	6.40367
YGR238C	10.8889	10.5109	8.87468	7.79245
YGR239C	10.0449	10.1089	8.2618	7.31746
YGR248W	10.3109	10.2424	8.52381	6.97692
YGR250C	10.8105	10.101	8.1875	7.36066
YJL129C	2.83	3.095	2.048	1.525
YJL132W	10.9054	10.75	8.86154	6.65175
YJL136C	10.101	10.4308	6.51725	4.33113
YJL137C	10.8885	10.1074	8.5	6.2
YJL139C	10.0405	10.4595	8.34444	6.30722
YJL140W	1.5	1.95108	1.73016	1.30928
YJL141C	10.9108	10.44	8.6875	7.37778
YJL151C	10.9103	10.8461	8.80588	7.92661
YJL160C	10.3429	10.7027	8.54444	7.1374
YJL161W	10.3494	10.341	8.73528	6.27211
YJL163C	10.2839	10.1044	8.74684	6.41744
YJL165C	10.8904	10.9306	8.50575	6.29077
YJL172W	10.8341	10.3108	8.85263	6.03333
YJL175W	9.01039	6.06557	2.55882	2.45614
YJL177W	10.1088	10.5733	8.21648	5.46452
YJL184W	1.44	1.4898	1.43056	1.23301
YJL189W	8.33333	8.07691	1.85542	2
YJL191W	10.4101	10.7297	8.2	6.34
YJL196C	10.481	10.9595	8.06329	7.73333
YJL200C	10.8889	10.6471	8.08488	6.03571
YJL206C	10.5101	10.5469	8.84285	7.72174
YJL213W	10.2889	10.7246	8.38828	6.31206
YKL096W-A	10.1039	10.1043	8.43802	6.4712
YKL115C	10.1089	10.7534	8.34043	5.57761
YKL139W	3.82411	2.731	1.86486	1.43119
YKL201C	10.5833	10.75	8.28168	6.64493
YKL202W	10.8059	10.5781	8.31579	6.93274
YKL204W	10.1029	10.1039	3.05405	2.5
YKL215C	10.5089	10.6765	8.20732	6.59712
YKL220C	10.8081	10.0411	8.75824	6.76642
YKR010C	10.1048	10.5479	8.86207	7.24
YKR019C	10.52	10.75	7.21505	6.25
YKR023W	10.9103	10.5541	8.65657	7.70577
YKR027W	10.1095	10.2879	7.18048	5.93617
YKR028W	10.8109	10.4	7.58186	6.00735
YKR029C	10.8811	10.101	8.80688	6.64615
YKR034W	10.2959	10.5	8.47253	7.0625
YKR036C	10.0281	10.7059	8.84444	7.1711
YKR039W	10.0881	10.101	8.08889	7.24107
YKR040C	10.8848	10.6611	8.72618	7.45161
YKR041W	10.2535	10.4933	8.64151	7.33333
YKR046C	10.4341	10.7101	8.77778	6.77102
YKR053C	10.1088	10.44	8.26437	7.1405
YML035C	10.8456	10.9028	8.08887	7.06931
YJL127C	10.1045	10.3529	6.58417	4.66935
YJL126W	10.101	10.0361	7.88804	5.70405
YJL124C	10.9439	10.274	8.54808	5.4
YJL123C	10.8493	10.3911	7.85149	6.10769
YJL122W	10.0481	10.511	8.15842	6.44776
YJL120W	10.5834	10.1039	6.27778	4.47
YJL121C	10.4304	10.2631	8.825	4.9037
YJL118W	9.10481	10.35	8.80188	5.20776
YJL119C	8.88804	10.5349	7.83519	5.75175
YJL117W	8.2	10.1091	7.16667	4.51266
YJL116C	10.5909	10.1073	8.38542	7.5
YJL115W	10.8548	9.71029	6.4888	4.76768
YJL112W	10.8109	10.6667	8.67368	7.16667
YJL110C	10.1051	10.871	8.86843	7.64276
YJL108C	10.4935	10.7	8.23364	7.36364
YJL107C	10.9383	10.7595	8.48057	6.61157
YJL106W	10.0959	10.4737	8.62245	7.2
YJL102W	10.4844	10.7246	8.55671	7.12371
YJL100W	10.8889	10.3	8.84158	7.25472
YJL099W	10.1031	10.9444	6.02326	4.96491
YJL098W	10.4031	10.7103	8.02174	7.90566
YJL096W	10.8	10.6984	7.47388	5.67568
YJL095W	10.8908	10.7761	8.88089	6.71552
YJL093C	10.8105	10.6811	8.06061	5.0577
YJL092W	10.391	10.7838	7.14737	5.66929
YJL089W	10.8889	10.5104	8.48387	7.61261
YJL088W	10.8344	10	8.38362	7.74074
YJL084C	10.8432	10.7368	8.45784	6.71756
YJL083W	10.0108	10.2432	8.86275	7.10733
YJL082W	10.8811	10.7273	8.51685	7.09322
YJL080C	10.1099	10.491	6.86471	4.707
YJL079C	10.9494	10.9506	7.54386	5.44375
YJL077C	10.1084	10.0107	8.21878	6.33051
YJL075C	10.2911	10.8767	7.86154	6.5338
YJL073W	10.4531	10.4444	7.54082	5.97214
YJL071W	10.0989	10.105	8.00801	6.59558
YJL068C	10.8543	10.4706	7.87273	7.59649
YJL067W	10.481	9.83871	7.15833	5.61006
YJL066C	10.9853	10.8861	8.32727	7.35135
YJL064W	10.451	10.4101	8.82474	7.60331
YJL065C	10.9083	10.1038	8.68367	7.47706
YJL063C	10.9108	10.3105	8.51648	7.27775
YJL062W	10.8389	10.7536	8.06667	4.97058
YJL060W	10.5541	10.8333	6.67742	4.91111
YJL059W	10.0284	10.5556	8.40426	6.672
YJL058C	10.8038	10.6941	8.58065	5.95105
YJL057C	10.8848	10.7465	8.65863	5.93333
YJL056C	10.9411	9.95651	7.88681	4.57595
YJL055W	10.3494	10.101	8.84285	5.19017
YJL053W	10.8988	10.8833	8.88372	5.49577
YJL052W	10.5481	10.8301	8.68605	6.97147
YJL051W	10.8	10.4853	8.47872	6.20167
YJL049W	10.3099	10.891	8.26864	7.12613
YJL048C	10.9105	10.1059	8.88889	7.31667
YJL047C	10.8389	10.1091	8.40688	5.72727
YJL046W	10.0508	10.7368	5.83808	4.57143
YJL045W	10.1005	10.9101	8.56383	6.56478
YJL044C	10.8889	10.2838	8.32609	6.64276
YJL043W	10.8581	9.79348	8.21505	7.47748
YJL038C	10.5581	10.1007	8.75248	7.33913
YJL037W	10.3888	10.8101	8.54884	7.05
YJL036W	10.885	10.8371	7.53822	7.46217
YJL030W	10.1088	10.1035	7.68224	7.35537
YMR062C	10.2531	10.6411	7.56757	7.07943
YMR063W	10.3581	10.9107	7.67029	6.05973
YMR064W	10.4259	10.551	8.83827	4.72727
YMR065W	10.9104	10.4101	7.3618	6.9476
YMR066W	10.1028	10	7.35484	5.31578
YMR067C	9.29349	10.6811	7.4188	6.66142
YMR068W	10.1084	10.0488	6.42249	6.2037
YMR069W	10.0101	10.5581	6.82742	6.79231
YMR070W	10.5853	10.5108	8.82879	5.71171
YMR071C	8.41084	10.6795	7.56061	7.07718
YMR072W	10.8301	10.791	7.05852	6.41121
YMR073C	10.3	10.551	8.73563	7.43768
YMR075C-A	10.5811	10.1071	8.18279	7.6699
YMR075W	10.4888	10.9277	7.01861	6.22321
YMR077C	10.8894	10.7424	7.16038	6.47674
YMR078C	10.9109	10.6076	7.87379	5.47913
YMR080C	10.2809	10.1089	7.78657	7.06542
YMR081C	10.9508	10.6105	7.87782	6.74721
YMR082C	8.84806	10.901	7.56646	6.22017
YMR083W	10.8891	10.4107	7.76471	7.29167
YMR084W	10.8109	10.08	7.76768	7.33058
YMR085W	10.8103	10.6104	7.17647	6.26667
YMR086C-A	10.9101	10.0429	7.84286	6.30507
YMR086W	10.2983	10.4411	7.24752	6.32456
YMR087W	10.831	10.9036	7.07018	6.70916
YMR088C	10.0881	10.3793	7.87581	6.65909
YMR089C	10.441	9.93	7.87534	6.5566
YMR090W	10.0381	10.8461	8.44628	7.57143
YMR091C	10.9844	10.5	3.27184	2.39048
YMR092C	10.4098	10.525	7.17828	6.77699
YNR070W	10.8811	10.7011	7.76471	7.59729
YNR071C	10.2803	10.1067	7.83654	7.01577
YNR072W	10.4583	10.101	7.61947	6.74776
YNR073C	10.0101	10.473	7.91071	6.77074
YNR074C	10.0381	10.9079	7.83578	6.95161
YNR075W	10.101	10.0899	7.77778	7.40974
YOL013W-A	10.3283	10.5851	7.28168	7.192
YOL086C	10.1089	8.65909	2.58364	2.79167
YOL087C	10.028	10.0588	6.00826	6.09574
YOL088C	10.2432	10.3429	6.80357	5.74561
YOL089C	10.0808	10.3095	8.43289	4.19702
YOL090W	10.9108	10.8101	7.65487	6.73477
YOL091W	10.4301	10.761	7.55832	7.00794
YOL092W	10.0333	10.3333	5.82885	6.71642
YOL093W	10.45	10.1071	7.88881	6.04072
YOL095C	10.5901	9.61065	5.20796	5.36275
YOL096C	10.8105	10.9101	6.77612	5.6775
YOL098C	9.10081	10.6701	6.42857	5.27727
YOL099C	9.1	10.741	7.81513	6.74738
YOL100W	10.8911	8.76577	6.48242	5.49606
YOL101C	10.1058	10.9506	7	6.20173
YOL103W	10.9529	10.6538	7.28226	5.77617
YOL104C	10.05	10.7101	6.58772	6.96725
YOL105C	10.5108	10.5105	7.29839	6.25217
YOL106W	10.8056	10.107	7.80357	6.71578
YOL107W	10.1025	10.3511	6.36441	6.54762
YOL108C	8.84286	8.04878	2.67769	2.32608
YOL109W	10.8804	10.6091	6.44853	5.67677
YOL110W	10.8101	10.358	6.68254	5.53778
YOL111C	10.4811	10.3067	7.31356	5.42753
YOL112W	9.9431	10.9529	7.07079	6.7
YOL113W	10.8025	10.0391	7.06481	6.94262
YOL114C	8.99	10.5681	7.80808	7.0315
YOL115W	10.8104	10.7424	6.17742	4.76376
YOL116W	10.1046	10	6.82812	5.70756
YOL117W	10.8589	10.6269	7.45763	6.70707
YOL118C	10.1005	10.6806	6.85271	6.22034
YOL119C	10.8848	10.9296	7.13821	6.30733
YOL121C	10.3848	10.8675	6.6087	6.55706
YOL122C	10.9889	10.4711	7.34746	5.74215
YOL124C	10.4255	10.6709	6.95276	6.65766
YOL126C	10.033	10.5579	6.96296	6.67467
YOL128C	10.3583	10.9868	7.48592	5.73767
YOL129W	10.8095	10.4487	7.13194	5.45726
YOL131W	10.8889	10.1073	6.68794	5.76744
YOL132W	10.839	10.8706	7.37879	5.77778
YOL136C	9.81081	10.8298	6.67227	6.56738
YOL137W	9.10101	10.381	6.86087	6.59759
YOL138C	9.88388	9.81053	7.6	7.06202
YAL016c-B	10.3411	10.0667	8.37864	6.6077
YAL037c-A	9.80951	10.7711	7.73458	5.54937
YAL067w-A	10.5288	10.0988	8.8844	5.9271
YAR035c-A	10.891	10.6747	8.28571	6.07744
YBL008w-A	10.834	10.831	8.41748	6.53275
YBL029c-A	10.891	10.951	8.42857	7.09524
YBL039w-A	9.825	10.1079	7.22851	6.73077
YBL071c-B	9.94	10.1046	5.625	5.47367
YBL071w-A	10.3489	10.1075	7.75556	3.57491
YBL101w-C	9.39251	10.4891	6.26761	5.96026
YBR056w-A	8.88826	10.9109	6.6732	6.09579
YBR058c-A	8.51051	4.27	7.56757	5.76923
YBR072c-A	10.3828	10.2	8.80082	5.7129
YBR085c-A	10.0833	10.3286	8.26	6.37346
YBR111w-A	10.1028	10.338	8.48485	6.36742
YBR182c-A	10.3811	10.1	8.05263	6.51577
YBR196c-A	10.9483	10.7691	3.08756	1.77704
YBR196c-B	10.8931	10.0281	7.84585	6.67372
YBR200w-A	10.8109	10.9759	7.74878	6.61765
YBR221w-A	10.5588	10.9268	7.86777	6.7037
YBR296c-A	10.101	10.0911	7.72518	6.6015
YCL001w-B	10.433	10.8	7.88876	6.71324
YCL057c-A	10.5511	10.939	7.64029	6.71324
YCR075w-A	10.801	10.6575	8.38709	6.75721
YDL085c-A	10.2581	10.0395	8.51515	6.41549
YDL159w-A	10.8109	10.8961	8.61765	6.63309
YDL160c-A	10.81	10.071	8.38542	6.77778
YDR003w-A	10.9349	10.31	7.2377	6.03311
YDR034w-B	10.101	10.6106	7.15866	6.11409
YDR079c-A	10.881	10.0725	7.28182	6.76765
YDR169c-A	10.4385	10.041	6.82171	6.27671
YDR182w-A	10.2449	9.06541	6.78219	6.36364
YDR194w-A	9.4811	9.07477	6.88684	6.04
YDR246w-A	10.4831	10.0101	8.86809	6.50365
YDR322c-A	10.1039	10.6866	8.26586	6.77178
YDR379c-A	10.358	10.411	8.26263	6.39567
YDR524c-B	10.8103	10.9109	5.83068	5.42336
YDR524w-A	10.1048	10.5584	6.25833	5.79933
YEL059c-A	10.8285	10.5679	7.21622	6.07746
YER053c-A	10.801	10.4767	8.16071	7.47361
YER087c-B	9.89	9.10286	6.88889	5.93421
YER175w-A	10.2959	10.0741	6.54237	5.62793
YER180c-A	10.2424	10.5949	7.25688	6.09396
YFL041w-A	10.834	10.5385	6.66372	6.25
YFR012w-A	10.101	10.3678	6.8	5.44242
YFR032c-B	9.1001	9.81088	5.18847	5.01734
YGL006w-A	8.85439	9.59804	5.87814	5.16667
YGL007c-A	3.28889	2.24104	2.02289	1.51776
YGL041c-B	10.4109	9.90909	5.88237	5.14094
YGL188c-A	10.4026	10.7945	2.85455	2.40909
YGR035w-A	9.28889	8.47411	5.28538	5.77357
YGR121w-A	10.911	10.1051	7.65	6.56522
YGR146c-A	10.0843	10.5075	7.42268	6.42537
YGR169c-A	10.3889	10.5873	7.08753	6.67595
YGR174w-A	10.2929	10	7.58163	7.19741
YGR204c-A	10.8091	10.3973	7.07618	6.04054
YGR271c-A	10.4405	10.6044	7.37255	6.26316
YHL015w-A	9.95	10.3404	6.84426	5.73718
YHR007c-A	10.5108	10.2604	6.87656	5.77721
YHR022c-A	10.839	10.0681	6.80833	6.52206
YHR050w-A	10.9011	10.1089	6.06823	5.73077
YHR086w-A	10.3299	10.1067	7.88889	6.72576
YHR175w-A	10.3088	10.9106	6.86346	6.33713
YIL002w-A	10.0989	10.1029	7.77174	6.72308
YIL046w-A	10.5103	10.0946	7.43564	6.47101
YIL134c-A	10.8481	10.4107	6.86843	6.27906
YIR018c-A	10.5485	10.3711	6.27867	6.12328
YIR021w-A	10.8283	9.76768	5.83828	5.45342
YJL012c-A	10.831	10.4105	5.85075	5.65738
YJL047c-A	10.1005	9.59804	6.08449	6.22603
YJL062w-A	10.8434	9.8571	6.32143	5.60656
YJL077w-B	10.9091	8.83636	6.20979	5.42657
YJL127c-B	9.10089	6.97103	6.38462	4.37333
YJL136w-A	10.101	10.3101	7.15315	6.75606
YJR005c-A	10.5109	10.5595	6.87854	6.32767
YJR135w-A	9.5	9.76471	7.4322	6.72034
YJR151w-A	10.5851	9.1028	5.72889	5.22024
YKL018c-A	10.958	9.94845	6.28032	5.23077
YKL068w-A	10.5884	9.46601	6.032	5.46626
YKL096c-B	10.1005	8.64865	5.4	6.21768
YKL106c-A	10.8841	8.10934	5.41487	5.26437
YAL024C	10.2858	10.8246	6.75309	6.69608
YBR299W	10.8839	10.3295	7.16848	6.52757
YCR107W	10.8105	9.58654	7.62385	6.17918
YDR242W	10.8558	8.56034	6.68852	5.71528
YDR326C	10.5489	9.52885	7.75	6.91045
YDR417C	10.9101	8.7521	4.65766	2.75301
YDR444W	10.8085	7.78906	7.05882	5.46707
YDR461W	9.91088	7.47368	6.672	5.01647
YDR493W	10.1039	10.6957	7.35714	6.34146
YDR502C	10.3333	10.8105	8.14286	6.9313
YDR506C	10.5859	10.044	8.51546	6.67116
YDR512C	10.8481	10.8108	6.27174	5.94574
YDR515W	10.3581	9.47105	7.5328	6.03333
YER089C	10.8941	10.375	8.17708	6.91111
YFL001W	10.0583	9.80435	5.94082	5.26378
YFL003C	10.1089	7.8061	7.58716	5.77261
YFL004W	10.011	10.9101	7.05217	6.52941
YFL007W	10.1094	10.1025	8.0283	6.52757
YFL010C	10.51	10.8795	7.78245	6.7208
YFL010W-A	10.3889	10.1011	8.65263	6.77318
YFL012W	10.8333	8.77679	7.34483	6.12
YFL013C	10.1084	9.04673	4.76415	4.75714
YFL016C	10.0848	10.7368	5.78188	5.34746
YFL033C	10.1088	9.8841	6.68245	6.31061
YGR122C-A	10.8104	7.50758	7.83386	6.7594
YGR162W	10.8829	10.4943	6.83333	5.33036
YGR252W	10.8109	10.2631	6.36883	5.42056
YGR254W	10.8358	10.6277	7.58274	6.23129
YGR255C	10.3106	10.527	6.88362	5.49577
YGR257C	10.981	10.1071	8.22727	6.75
YGR258C	10.4858	10.6941	8.75258	6.90226
YGR271W	10.825	9.08108	7.76147	6.10526
YGR272C	9.42858	9.10789	3.15054	3.45
YGR273C	10.1088	9.72811	8.42424	6.35616
YGR276C	10.38	10.1046	8.48784	7.33333
YGR289C	9.10049	9.91037	7.20175	6.31667
YGR291C	10.9349	8.36975	7.86262	5.99342
YGR292W	9.53884	8.61007	7.50442	5.19101
YGR295C	10.3253	10.381	6.62016	6.74453
YHR132W-A	10.881	9.78101	6.60656	6.21918
YIL030C	10.981	10.1085	7.06422	5.23008
YIL058W	10.8241	9.98011	7.85702	6.04575
YIL092W	10.1089	9.71045	7.27886	6.07795
YIR023W	10.3908	8.38461	7	5.61146
YIR030C	10.101	8.96396	7.02528	5.94156
YIR032C	10.881	8.61007	7.05833	6.70435
YIR043C	10.8528	8.4491	7.87618	6.16437
YIR044C	10.3285	8.28333	7.15652	6.59712
YJR003C	9.88255	7.56391	7.67188	6.57993
YJR055W	10.941	10.3875	6.28182	5.41045
YKL053C-A	10.951	10.8731	5.38175	5.66116
YKR106W	10.1093	10.6625	8.8	7.392
YMR191W	10.1054	10.1001	8.16667	7.00725
YMR322C	10.3804	9.76699	7.5625	6.30345
YNL138W	10.0488	9.84311	8.85385	6.2027
YNL140C	10.1009	8.54701	7.27027	6.01316
YNL142W	10.101	8.43697	7.61847	6.14667
YNL315C	10.881	10.0625	7.83862	6.17776
YOL151W	8.8891	7	7.55752	6.00645
YOL152W	10.8988	10.0909	7.87541	7.55124
YOL155C	10.1084	10.0778	7.06255	6.66906
YOR265W	10.4929	10.3448	7.88808	7.432
YOR266W	10.8108	10.0101	7.38804	7.17178
YOR267C	10.9806	10.7957	7.33333	6.92366
YOR268C	10.0411	10.1061	7.6422	6.72736
YOR269W	10.9853	9.10868	6.08402	5.76452
YOR270C	9.33333	9.10608	6.20689	4.16406
YOR271C	10.8881	8.36104	7.58458	6.53746
YOR273C	10	6.87075	7.55263	6.01977
YOR274W	8.5303	6.50658	5.64567	5.31325
YOR275C	10.0841	10.4526	6.05838	6.775
YOR276W	10.5541	10.8571	7.20588	6.25706
YOR298C-A	10.8859	10.7097	7.05085	7.13271
YOR302W	10.5541	10.6091	7.00819	6.7217
YOR303W	10.9104	10.701	7.72656	6.65
YPL004C	10.3049	10.0297	7.37879	6.29252
YPL017C	10.8883	10.5	7.26786	6.75968
YPL027W	10.3596	8.99099	7.37069	6.06711
YPL034W	10.5988	8.79825	7.63636	6.72662
YPL036W	9.88885	7.81001	7.55263	5.1573
YPL078C	9.83404	9.84536	7.83414	6.1374
YPL137C	8.39109	7.47368	7.34234	5.74743
YFL033C	10.9333	10.377	8.82531	7.4
YFL063W	10.8889	10.1071	8.45182	7.12105
YJL103C	10.8833	10.9351	7.80881	6.04754
YML073C	10.538	10.6935	6.82388	7.63529
YNL011C	10.8108	10.1037	8.52885	7.0614
YNL014W	10.4858	10.6849	8.35285	7.79371
YNL047C	10.8108	10.8904	8.38623	7.06422
YNL053W	10.0885	10.6087	8.61538	7.77325
YNL055C	10.2983	10.0281	6.58847	4.29412
YNL059C	10.8	9.05556	4.16438	2.07071
YNL069C	10.4533	10.2609	7.31522	5.73674
YNL086W	10.8341	10.9881	8.47525	7.90991
YNL089C	10.311	10.4535	6.81481	5.74746
YNL096C	10.9108	10.9107	7.70642	6.61607
YNL109W	10.5286	10.0563	8.55435	7.5463
YNL111C	10.2889	10.8939	8.74725	7.60194
YNL147W	10.881	10.9411	8.32879	7.01702
YNL220W	10.8889	10.0606	8.78069	6.36273
YNL268W	10.4545	10.3857	8.73737	7.275
YNL284C	10.5102	10.51	8.3617	7.2451
YNL315C	9.881	10.0625	7.83862	6.17776
YNR033W	10.4889	10.9107	8.86843	7.63063
YOL148C	3.35556	1.7101	2.22857	1.4
YOL151W	10.2888	10.525	8.04167	6.77754
YOL152W	10.1054	10.5747	8.34578	6.53607
YPL158C	10.1083	10.2593	8.68307	6.75377
YPL183W-A	10.588	10.71	8.888	7.73745
YPL194W	10.8354	10.1005	8.05505	7.37393
YPR011C	10.9888	10.7791	8.05618	7.0315
YPR021C	10.8384	10.3293	8.50485	6.76692
YPR083W	10.1011	10.7037	8.08429	6.70328
YPR091C	10.8	10.36	8.03738	6.29777
YPR118W	10.1081	10.1069	8.76087	6.77363
YPR133W-A	10.5841	10.8511	5.28526	3.72758
YPR151C	10.9806	10.527	8.62366	7.72174
YEL012W	10.8109	10.5301	8.48256	7.77325
YER031C	10.311	10.5811	8.02632	7.23016
YER046W	10.1049	10.6588	8.28816	7.15044
YER063W	10.1088	10.0455	8.08756	7.40566
YER066W	10.8043	10.2911	8.45055	7.03508
YGR188C	10.9851	10.0946	8.84478	6.17768
YGR201C	10.0511	10.575	8.56627	7.67696
YGR204W	10.859	10.3	7.66234	6.32432
YHL002W	10.8811	10.7441	8.34839	7.20354
YHL011C	10.534	9.473	5.082	4.779
YHL039W	10.9108	10.3333	8.86761	7.74276
YHR003C	10.8101	10.6551	8.80518	7.14615
YHR004C	10.5109	10.3509	8.6688	7.76667
YHR005C	10.0989	10.3011	8.80233	7.41176
YHR006W	10.9405	10.4941	8.8	7.77095
YHR008C	10.0989	10.3729	8.87879	6.96226
YHR009C	10.8554	10.3059	8.32059	7.74358
YHR025W	10.3933	10.4767	6.83333	5.97462
YHR026W	8.39828	7.8109	2.08346	1.74561
YHR041C	10.101	10.0405	8.88889	6.65477
YHR059W	10.101	10.9108	8.8	5.9901
YHR067W	10.881	10.3101	8.81622	7.67269
YHR127W	10.8511	10.7108	8.36765	7.26364
YHR131C	10.5833	10.9341	8.15476	7.47571
YHR180W	10.01	10.3103	8.25	6.19728
YHR185C	10.2828	10.6548	8.17249	6.91537
YHR194W	10.8311	10.4103	7.46377	6.71905
YLL007C	10.551	10.7935	7.43787	6.70142
YMR154C	10.1089	10.4101	8.83243	6.61194
YNL274C	10.8811	10.2644	8.62828	6.72058
YOL141W	10.425	10.951	8.70329	7.04777
YOL143C	5.10333	1.53101	2.17742	1.30672
YOL150C	10.8333	10.0667	8.77879	5.77752
YOL158C	10.2881	10.75	8.47618	6.27517
YOL159C	10.8981	10.8876	8.31765	6.6731
YOL160W	10.2883	10.0909	8.2875	6.30405
YOL162W	10.1008	10.4107	8.38437	5.67377
YOL163W	10.1048	10.3647	8.14773	6.14474
YOR008C-A	10.4108	10.2691	8.70886	5.10596
YML037C	10.0881	10.038	8.47817	7.15778
YML034W	10.8858	10.8986	8.31859	7.69444
YML035C-A	9.80951	10.6081	8.48571	7.30631
YML033W	9.10883	10.011	8.06185	7.99057
YML032C	9.91089	10.8806	7.55208	5.9505
YML030W	10.8891	10.6411	8.31859	7.14151
YML029W	10.8945	10.3105	8.36667	7.94949
YML028W	10	10.107	8.83686	7.76792
YML026C	10.3389	10.9104	8.06887	6.07726
YML024W	10.8885	10.0345	8.2	6.59223
YML020W	10.105	10.7093	8.5283	7.47058
YML019W	10.8101	10.7595	6.80808	5.02913
YML018C	10.8593	10.961	8.07821	7.12744
YML017W	10.4939	10.0541	8.62887	6.03906
YML016C	10.8805	10.0548	8.84444	7.25793
YML014W	10.0488	10.806	8.5	6.26496
YML013W	10.8559	10.8	8.25263	6.97458
YML013C-A	10.4026	10.1075	8.62186	6.23529
YML012W	8.84409	10.6905	8.66337	6.23664
YML011C	8.9	10.506	8.50826	7.02459
YML010W-A	10.0536	10.3065	8.42857	6.76392
YML009c	10.5889	10.1081	8.31633	7.19444
YML008C	9.10345	2.625	1.54878	1.57763
YML007W	10.0108	10.0759	8.82157	7.45377
YML006C	10.988	10.2771	8.77528	7.06667
YML005W	10.9109	10.5104	8.35417	6.20979
YML004C	9.8885	10.0759	8.28081	6.36691
YML003W	10.3011	10.9595	8.86275	6.14493
YML002W	8.91041	10.1048	8.37383	6.95348
YML001W	8.88889	10.92	7.26364	5.49218
YMR002W	10.9888	10.5567	8.31532	7.0708
YMR003W	10.2886	10.5101	8.46789	7.23529
YMR006C	9.41081	8.31058	7.4818	6.52448
YMR007W	9.94286	9.98058	8.83	5.77703
YMR008C	9.85	10.4646	8.47817	5.97977
YMR009W	9.10089	10.6979	7.82059	6.125
YMR010W	9.10109	10.0595	8.28526	4.96575
YMR011W	8.48541	10.1066	8.08008	6.15942
YMR012W	8.458	10.4578	8.75238	6.14174
YMR014W	10.0109	10.6265	6.58783	5.09649
YMR015C	10.4935	10.5977	6.88889	4.51402
YMR016C	10.5485	10.631	8.38175	7.77641
YMR017W	10.5529	10	8.37834	7.74757
YMR018W	10.8388	8.61067	8.78687	7.59729
YMR019W	10.8384	10.0777	8.88235	6.76992
YMR020W	10.0858	10.3736	8.88889	6.36691
YMR021C	10.1085	10.6091	8.73626	6.30952
YMR022W	8.50808	10.101	8.15	5.64775
YMR023C	9.81028	10.2651	8.47169	7.23077
YMR024W	9.10089	10.931	8.22	6.66412
YMR025W	8.925	10.1063	8.88247	6.14174
YMR026C	10.881	10.593	8.42268	7.24324
YMR027W	10.1011	10.5795	8.37615	7.76178
YMR029C	10.4944	9.78431	8.08204	7.34426
YMR030W	10.8046	10.101	8.385	7.30328
YMR031W-A	10.3548	10.1059	8.1	7.47244
YMR031C	10.59	10.6291	8.67368	6.14474
YMR032W	10.8448	10.9551	4	4.73554
YMR034C	9.30358	10.6979	8.0625	6.2575
YMR035W	1.4	1.38095	1.52849	1.69474
YMR036C	8.58811	10.1083	8.68524	7.00794
YMR039C	10.881	10.1044	7.88526	5.10101
YMR040W	10.4349	10.7273	7.78804	7.4568
YMR041C	10.2553	10.7273	8.35779	7.17033
YMR042W	10.8883	10	8.88089	6.45375
YMR044W	10.4411	10.4545	8.23636	6.42963
YBR232C	10.8028	9.7957	8.31683	6.45714
YDR424C	10.3243	9.54839	8.84681	6.66337
YEL011W	10.8024	9	7.71579	6.75926
YER064C	10.8254	9.78409	8.85869	7.35455
YER077C	9.8109	5.68966	7.16667	4.37614
YER078C	10.3105	9.49495	8.52336	7.06923
YER088C	10.8448	10.2875	8.21429	7.14407
YER090W	10.4384	9.46753	7.68048	6.66949
YER091C	10.0441	8.73108	6.5888	5.7
YER092W	10.8884	7.86511	6.87838	6.41753
YER093C-A	10.8586	9.28889	8.40217	7.99037
YER095W	10.034	9.495	8.337	6.156
YER096W	10	10.951	8.16667	7.77277
YER097W	10.8028	9.89247	8.5	7.9376
YER098W	10	10.6931	8.27828	6.77228
YGR134W	10.9259	10.6105	7.15788	6.64516
YGR210C	10.9839	10.103	7.6	6.77755
YHL024W	10.1009	10.0879	7.68857	6.21533
YHL025W	1.35556	1.4761	1.31884	1.55294
YHR016C	10.8885	9.34043	8.87881	7.76577
YHR017W	10.0825	9.28409	8.30682	7.07216
YHR032W	10.2811	9.78889	7.7618	6.77678
YHR045W	10.3888	10.3827	8.4086	7.97095
YHR064C	10.839	10.477	6.78257	5.12451
YHR140W	10.5883	9.32	8.24324	6.75926
YHR162W	10.1088	9.37634	7.56364	6.55725
YHR168W	10.1099	9.01073	7.40566	6.37393
YHR181W	10.9545	9.69101	7.41803	6.52336
YHR191C	10.8481	8.39474	7.63218	6.26531
YHR193C	10.9883	9.87356	7.41835	6.47113
YLL030C	10.8949	10.1045	8.40816	7.15741
YLL044W	10.9429	8.62791	6.88858	6.24771
YLL048C	10.885	9.10404	8.2885	7.66071
YLL049W	10.81	8.30488	6.64706	5.41129
YLL059C	10.1094	10.0108	7.44	6.66154
YLR030W	10.8353	10.4511	7.885	6.46729
YLR031W	10.4839	10.5105	7.83186	6.32653
YLR032W	10.1039	9.94444	7.62838	7.47778
YLR034C	10.85	10.4045	7.78339	6.7766
YLR035C	10.3333	8.81053	8.74038	7.32231
YLR036C	10.2405	10.1045	8.17388	7.93636
YLR037C	10.4105	9.64773	8.88288	7.06731
YLR038C	10.0109	9.52941	7.78766	6.75593
YLR039C	10.1005	8.10761	7.16485	5.62016
YLR040C	10.9109	9.58065	8.82642	6.75238
YLR041W	10.3256	9.84783	7.72807	6.77675
YLR050C	10.5101	9.625	8.47664	6.95652
YLR052W	10.01	7.067	6.485	5.269
YMR142C	9.81088	10.678	2.26805	1.71053
YMR158W	10.5989	9.08791	8.42268	6.75241
YMR171C	10	9.74711	8.80682	6.75247
YMR181C	10.984	9.86957	8.02062	6.73758
YMR209C	10.0528	10.5488	7.46875	6.30392
YMR271C	10.3429	10.011	8.23864	6.52041
YMR279C	10.4885	10.9589	7.78582	6.67075
YMR306W	10.891	9.42553	8.0582	6.57475
YMR311C	10.8859	10.1004	7.83333	7.70342
YMR312W	10.8858	8.04761	6.38709	5.75
YMR313C	10.5851	9.39796	7.84071	6.77034
YMR315W	10.5538	9.84043	7.70768	6.01064
YMR316C-A	10.3101	10.1096	7.84	6.62626
YMR316C-B	10.8358	10.4253	8.38144	6.23957
YMR316W	3.10288	1.49511	1.52542	1.70714
YMR317W	10.1089	9.88095	8.875	7.75754
YMR318C	10.4859	9.631	8.88889	7.14912
YMR319C	10.8988	10.0429	8.54737	7.71171
YMR320W	10.1081	10.1028	8.58783	7.29661
YNL250W	9.25	10.659	8.348	5.17
YNL252C	10.3804	9.10441	7.43434	6.51667
YNL279W	10.8806	9.76087	8.5566	6.12071
YNL300W	10.4051	10.6961	7.72043	6.17204
YNL316C	10.8451	10.625	8.61538	6.67757
YOL016C	10.8283	9.6	8.87708	7.72773
YOR096W	9.88831	5.65909	5.18245	3.61667
YOR306C	10.81	9.96703	8.38462	6.79313
YOR317W	10.1099	6.75904	4.05505	4.37692
YPL132W	10.9491	10.36	7.80722	5.775
YPL134C	10.85	10.105	8.20561	6.05333
YNL242W	10.0986	10.4405	8.28032	7.14912
YNL239W	10.88	10.0943	7.88832	6.0229
YNL237W	10.4242	10.9481	8.6	5.56979
YNL236W	10.9883	9.49011	4.77027	2.60194
YNL235C	10.0804	10.2468	8.35354	6.5534
YNL233W	10.1089	10.5783	8.08	6.772
YNL231C	10.811	10.8765	8.08302	7.45536
YNL230C	10.8441	10.6986	8.02381	7.11927
YNL229C	4.05881	2.83051	1.36471	1.30526
YNL228W	10.8939	10.5405	6.52565	4.7
YNL226W	10.0556	10.6667	5.73626	4.97957
YNL227C	10.0808	10.1059	5.54659	4.79439
YNL225C	5.42	2.48	1.55405	1.1977
YNL224C	10.8831	10.869	8.08308	7.59794
YNL219C	10.4109	10.4	8.38554	7.37778
YNL217W	10.1088	10.3256	8.03408	7.76768
YNL215W	10.8109	10.9041	8.23457	5.51042
YNL214W	10.4891	10.3011	8.76843	7.32777
YNL212W	10.3908	10.1009	8.71689	7.07257
YNL211C	10.32	10.4875	8.80808	7.06452
YNL206C	10.8448	10.8108	8.86471	6.5097
YNL205C	10.8289	10.5571	8.45819	7.77778
YNL204C	10.3488	10.1083	8.38241	6.95779
YNL202W	10.1026	10.8293	8.28545	6.56667
YNL203C	10.3983	10.0649	8.86581	6.72566
YNL201C	10.9858	10.32	8.78787	7.53333
YNL200C	10.9049	10.3478	8.07844	7.04097
YNL199C	10.9559	10.6377	8.63218	4.45
YNL198C	10.0108	10.7444	8.74766	6.71795
YNL197C	10.8106	10.1057	8.27174	6.56566
YNL196C	10.8106	10.2468	8.78261	6.13793
YNL195C	10.3109	10.7901	8.37234	7.3211
YNL194C	10.4288	10.3696	8.84	6.61475
YNL193W	10.2839	10.1033	8.86588	7.17391
YNL191W	10.8101	10.505	8.54717	6.65791
YNL190W	10.8299	10.5859	7.43519	5.60741
YNL187W	10.3089	10.6511	7.78383	6.23611
YNL184C	10.1081	9.36667	6.72321	5.02238
YNL183C	10.2481	10.3733	8.83182	6.72758
YNL179C	10.8951	10.8731	8.76404	6.43925
YNL177C	10.1083	10.51	8.68565	5.71428
YNL176C	10.5244	10.1061	8.17647	7.27966
YNL175C	10.8985	10.2593	8.62637	7.05042
YNL173C	10.8901	10.427	8.26471	7.77447
YNL170W	10.8858	10.1067	6.85062	5.39
YNL168C	10.1096	10.977	8.42529	7.17348
YNL160W	10.9494	10.101	8.81481	7.33654
YNL159C	10.3881	10.0588	8.78489	7.33333
YNL157W	10.8858	10.0676	8.32184	6.35294
YNL155W	10.8849	10.1092	8.76087	6.60169
YNL154C	10.8988	10.71	8.02353	5.27966
YNL148C	10.9103	10.7286	5.52809	3.51376
YIL098C	9.59804	8.31056	7.33333	6.24578
YIL099W	8.8841	7.01089	6.88056	4.54167
YIL100W	8.10051	7.10789	5.74343	4.27279
YIL101C	8.91083	7.41081	5.58333	4.30667
YIL102C	8.88241	7.875	6.18718	4.55634
YIL103W	10.0583	9.38889	6.22656	4.79063
YIL105C	8.088	7.5101	4.88383	3.64198
YIL107C	8.10856	8.5431	5.48664	4.69798
YIL108W	8.54839	7.10858	4.73484	4.37572
YIL110W	8.51004	8.68696	6.52033	6.03252
YIL111W	8.88826	8.38333	6.4375	4.3125
YIL112W	9.09009	8.52541	6.81538	4.37462
YIL113W	8.981	8.64957	6.58848	4.90909
YIL114C	8.981	8.52941	6.15827	4.69065
YIL116W	9.10811	8.44628	5.81882	4.44595
YIL117C	8.48108	7.85496	6.58748	5.0566
YIL119C	8.92	8.24793	5.20253	4.41139
YIL120W	8.41029	7.69925	5.86509	5.0355
YIL121W	8.85101	7.9	4.87864	4.52774
YIL122W	8.884	7.101	6.48629	5.72593
YIL123W	8.84109	7.48091	5.40876	2.07029
YIL124W	8.88544	7.976	4.76866	1.75721
YIL125W	8.10399	7.45455	5.87838	4.29054
YIL128W	8.84409	7.10571	5.84517	4.77419
YIL130W	8.89082	6.80951	5.25444	4.90533
YIL131C	8.84109	7.10858	5.36085	4.95266
YIL132C	8.91058	6.64901	5.21883	5.07776
YIL133C	8.49031	7.1071	4.88017	4.74566
YIL134W	8.1001	7.6641	6.81473	5.47737
YIL135C	8.41083	7.76378	5.88242	3.54545
YIL136W	8.30329	7.79101	6.51825	4.76642
YIL137C	8.10393	7.75104	6.17647	4.54412
YIL138C	8.91039	7.75385	5.85235	4.91275
YIL139C	8.525	7.30101	5.82353	5.01961
YIL140W	8.10581	7.35766	5.86	4.56
YIL141W	8.10311	7.65909	5.62581	5.12903
YIL145C	8.88889	7.35507	5.01685	4.75743
YIL146C	8.10391	6.37975	6.48571	5.79276
YIL148W	8.81011	7.33333	5.48684	2.51235
YIL149C	8.10286	6.41008	5.54321	4.51235
YIL152W	8.98425	7.38686	5.4838	4.51729
YIL153W	8.49108	6.7071	5.85	3.7631
YIL154C	10.3888	10.7935	7.46154	6.95726
YIL155C	8.9885	7.43796	5.23382	4.72456
YIL156W	8.24286	6.9589	4.88831	4.62712
YIL157C	5.90899	6.5741	4.78723	4.14362
YIL158W	8.59091	6.70861	6.80805	5.94631
YIL159W	8.55085	7.10493	5.88281	4.15603
YIL160C	8.54108	7.5101	6.08586	3.77652
YIL161W	8.85089	7.48889	6.5037	4.65175
YIL162W	8.88801	6.89796	5.82763	4.42763
YIL163C	8.83811	7.52941	5.84737	4.54605
YIL164C	8.40104	7.28571	5.82166	4.75159
YIL165C	8.43333	7.40106	5.68872	4.64744
YIL166C	8.8881	7.10029	5.36805	4.70952
YIL167W	8	6.81008	5.37857	4.70658
YIL168W	8.28811	6.98611	5.22807	5.14035
YIL170W	8.85039	6.70667	6.62863	5.23704
YIL173W	8.85989	6.4359	6.14583	5.24306
YIR001C	8.10381	6.99296	5.54717	4.65408
YIR002C	8.59848	6.54901	5.18288	4.7193
YIR003W	8.10803	6.2795	5	4.50747
YIR004W	8.54545	6.36076	5.02857	4.77428
YIR005W	9.02851	7.56489	6.16549	5.56391
YIR007W	8.10598	6.26061	5.84416	4.31168
YIR009W	9.03804	7.10266	6.15862	4.24138
YIR013C	8.85411	6.61089	5.57055	5.23313
YIR014W	8.10885	6.52564	5.85	4.7125
YIR016W	8.50311	6.26087	4.84688	4.39791
YLR042C	10.5	10.5937	8.68803	7.73495
YLR043C	10.811	10.9535	8.5566	7.09434
YLR044C	10.3388	10.3878	8.07143	6.99107
YLR046C	10.4948	10.567	8.84876	7.15676
YLR047C	9.88105	9.94108	7.32258	6.25706
YLR048W	10.1088	10.3506	6.48019	5.56763
YLR049C	10.1085	10.1076	6.71739	6.02174
YLR053C	8.53881	8.65546	7.45802	7.2377
YLR054C	9.10101	9.10455	7.88686	7.49565
YLR055C	10.1033	10.1033	8.67742	6.50538
YLR056W	10.9411	4.10106	6.28889	1.73737
YLR057W	9.10545	9.2	7.86522	6.6
YLR058C	9.9899	10	8.15741	6.7037
YLR059C	9.04505	9.05405	7.4065	6.43902
YLR061W	8.41033	6.10667	3.72826	3.41304
YLR062C	8.83333	6.06667	3.51579	3.47367
YLR063W	9.4486	9.47664	5.00575	4.72414
YLR064W	8.51095	8.57627	4.58668	4.34973
YLR065C	8.50888	8.67544	8.42379	7.69369
YLR067C	10.2839	10.1067	8.73563	5.67716
YLR068W	10.9484	10.2631	7.88157	5.06024
YLR069C	10.338	10.6338	5.6	3.6125
YLR070C	8.90109	8.88393	7.68376	6.5641
YLR072W	8.82889	7.63636	5.84615	4.49358
YLR073C	9.10103	9.10001	6.17833	5.0137
YLR074C	10.551	10.104	7.88837	6.72093
YLR077W	9.34906	9.42453	7.68168	7
YLR079W	10.1089	9.90625	6.65263	3.25263
YLR080W	8.88106	7.62595	7.20472	4.67164
YLR081W	8.83581	6.8561	6.73843	5.57955
YLR082C	8.10424	7.10424	5.86053	4.65779
YLR083C	8.98249	8.90826	6.50847	4.17797
YLR084C	8.81009	8.62931	3.71849	3.12175
YLR085C	9.41089	9.41067	6.58571	5.10714
YLR087C	9.80825	9.49485	4.23577	2.37211
YLR089C	9.01089	9.1028	4.46289	4.27533
YLR090W	8.8881	7.81001	7.18802	6.53543
YLR091W	10.3108	9.88101	7	4.03922
YLR092W	8.10548	8.1051	7.38284	5.53658
YLR093C	8.88598	8.86841	3.47222	2.72222
YLR094C	8.85849	7.63359	6.85385	5.32308
YLR095C	9.1001	9.10909	7.24	5.424
YLR096W	8.5339	8.58475	2.80333	2.17
YLR097C	8.81089	8.86841	6.1875	5.1775
YLR098C	8.58103	7.60901	3.18435	3.00353
YLR099C	9.8441	9.70101	6.83846	6.36923
YLR102C	8.81001	8.77876	7.27642	7.01626
YLR104W	8.38511	7.37037	7.1688	5.6129
YLR107W	8.89883	7.89683	7.02418	5.31452
YLR108C	8.92	7.888	3.78414	3.163
YLR109W	8.50428	8.52991	6.45238	5.43447
YLR111W	10.5904	10.107	8.70288	7.1357
YLR112W	8.81011	8.9105	3.56723	3.32353
YLR113W	8.98305	8.07627	4.34568	4.30764
YLR114C	8.89389	7.70991	6.66888	6.51471
YLR118C	8.51093	7.50746	6.57353	5.33724
YLR119W	8.34454	8.28571	5.88383	4.31034
YLR120C	8.5881	7.55303	6.08423	5.17121
YLR121C	8.88844	7.8061	5.42583	4.9321
YLR122C	8.28333	8.33333	5.70886	5.71013
YLR123C	8.2811	8.29508	3.16245	2.97556
YLR124W	9.25926	9.34259	5.18675	5.11446
YLR125W	9.35849	9.50943	4.67742	4.5914
YLR228C	9.41005	7.53676	8.88216	5.46711
YLR231C	8.98429	6.10365	7.224	4.76395
YLR232W	10.1035	9.3	7.88871	6.41406
YLR233C	9.59049	7.77099	7.42149	5.544
YLR234W	10.381	10.0326	6.28526	2.42342
YLR235C	10.3088	8.81033	4.71569	2.31746
YLR236C	8.10038	7.105	6.26573	5.27947
YLR238W	8.08091	5.80347	5.85302	5.2703
YLR239C	8.33051	7.47761	6.88319	6.09747
YLR240W	9.9881	4.29101	1.75325	1.49123
YLR241W	10.3911	6.47105	7.03077	5.592
YLR242C	10.2933	7.48485	3.88235	2.21568
YLR244C	5.43398	5.24561	2.80282	1.95062
YLR247C	8.28829	7.55396	6.86289	5.49645
YLR248W	8.10105	8.102	6.75385	6.15733
YLR250W	8.1	6.71033	7.25217	5.62791
YLR251W	8.84881	6.75103	7.2735	5.9771
YLR252W	10.3809	6.92667	8.81739	6.37778
YLR253W	9.40588	5.76404	7.8823	5.45968
YLR254C	9.10889	6.1047	8.08829	5.15
YLR255C	8.91084	5.60656	7.02308	5.65441
YLR257W	8.102	7.87786	7.56667	5.33333
YLR258W	8.2541	7.9691	6.87682	5.225
YLR260W	10.5859	10.963	6.0287	5.02128
YLR261C	8.85849	7.67669	6.88187	4.41322
YLR262C	8.25381	7.01083	5.80808	4.96721
YLR263W	8.35508	6.36411	6.06784	5.77313
YLR264W	10.8046	8.10846	8.07885	4.54795
YLR265C	10.101	5.97674	8.58048	2.09009
YLR266C	9.38101	6.37267	8.21818	2.46957
YLR267W	8	5.66667	6.78235	2.37903
YLR268W	10.5105	9.53261	6.86809	1.264
YLR269C	8.0901	7.81095	7.72034	3.22963
YLR270W	10.909	10.2588	8.51725	2.64463
YLR271W	8.10901	7.45245	6.61584	2.79245
YLR273C	8.84249	7.01079	6.60741	3.13291
YLR278C	8.1044	5.55978	6.61429	4.97163
YLR279W	9.80589	8.07258	6.36429	6.15733
YLR280C	8.98911	7.0551	6.80741	4.53226
YLR281C	8.8251	7.71	6.87218	4.99398
YLR282C	8.48108	7.80303	6.88059	4.73977
YLR283W	8.325	6.52866	6.28329	4.93452
YLR284C	8.1011	6.7947	7.73333	5.20755
YLR285W	8.04928	7.10278	7.46809	5.47201
YLR287C	8.38846	6.48428	7.84615	5.17734
YLR287C-A	10.5053	7.37589	6.75184	5.06211
YLR288C	8.80435	6.78808	6.54676	5.90476
YLR289W	8.42983	6.51091	6.38184	5.52206
YLR290C	8.85359	6.60645	6.58883	5.74921
YLR292C	9.08333	9.33961	7.88889	5.16667
YLR294C	8.10104	9.1031	7.22222	5.09259
YLR295C	4.80455	1.51081	1.48528	1.53746
YLR296W	8.25889	7.57353	6.4375	4.79655
YLR297W	8.8881	7.48905	5.38887	5.02976
YLR299W	10.0303	8.51061	7.80172	6.27778
YLR300W	8.82595	6.36478	6.64706	4.7351
YLR303W	8.28481	7.10388	6.55882	5.39726
YLR304C	5.80889	4.01008	2.87807	2.37532
YLR306W	8.88393	9.08108	7.32787	5.2125
YLR307W	8.5339	8.54107	7.18849	5.46452
YLR308W	8.88106	8.26829	6.3617	5.57107
YLR309C	8.01099	9.10711	6.88462	5.76667
YLR311C	8.93101	8.10548	7.12613	5.13295
YLR312C	8.38101	7.0971	6.83088	5.0338
YLR312W-A	10.2889	10.3101	8.41758	4.53278
YLR313C	8.81031	7.88461	7.84038	4.61497
YLR315W	10.5081	10.3253	8.88773	4.47175
YLR318W	8.93851	8.2611	6.88425	5.04728
YLR319C	8.38885	5.00498	6.80076	4.97077
YLR320W	10.2983	10.8701	6.24739	2.90654
YLR322W	8.48388	6.09105	4.8	2.90476
YGR256W	10.5829	10.4091	7.56779	5.66102
YGR259C	10.0489	9.30476	6.875	4.67742
YGR260W	10.8558	10.3101	6.58258	5.30597
YGR261C	10.9828	10.5506	6.31707	4.36718
YGR262C	5.84545	6.46341	2.84175	1.7775
YGR263C	10.5881	7.66411	6.74533	5.73973
YGR266W	10.089	10.7326	8.18266	5.42574
YGR268C	10.0843	10.961	8.38085	5.70769
YGR269W	10.9881	10.0108	8.37383	5.90909
YGR270W	10.0981	10.5488	7.74775	3.72642
YGR275W	10.8432	8.40104	6.58209	5.30328
YGR279C	10.2811	10.4324	8.64078	3.57163
YGR281W	10.1058	10.7101	8.17172	4.72642
YGR282C	10.101	10.8811	7.63158	4.42975
YGR283C	10.1048	10.4108	7.56483	4.12295
YGR284C	10.9103	10.7527	7.67826	4.475
YGR285C	10.8889	10.7041	3.56824	2.91
YGR286C	10.3939	10	6.8	5.35397
YGR287C	10.5851	9.71005	7.18	5.144
YGR288W	10.2581	10.4687	7.58621	4.94276
YGR290W	10.9108	10.5625	8.53846	3.71373
YHR021W-A	10.3333	9.5101	7.01562	4.64775
YHR039C-B	9.33929	8.98551	2.58824	1.47
YHR079C-B	10.8981	10.2556	7.58167	5.30973
YIL009C-A	10.026	10.771	6.52583	4.552
YIR017C	10.105	10.8711	6.07333	5.464
YIR018W	10.3833	10.291	6.82188	5.11364
YIR019C	8.80085	10.0106	8.1	6.35778
YIR020C	10.3253	10.4045	8.17526	4.71667
YIR020W-B	10.8931	10.0109	8.07216	5.30097
YIR021W	10.891	10.76	8.51852	3.64078
YIR024C	10.8109	10.601	8.43825	5.20155
YIR025W	10.9888	10.0495	7.54167	5.17172
YIR026C	10.491	9.33333	5.22449	3.35797
YIR027C	10.8354	10.7093	7.83829	5.40152
YIR028W	10.2535	10.3571	7.8008	5.79545
YIR029W	10.8109	10.2525	7.64348	5.39735
YIR031C	10.481	10.4933	8.41488	4.9375
YIR033W	10.8106	10.4853	8.03371	5.26167
YIR034C	9.88099	10.0488	6.78378	5.36154
YIR035C	10.8093	10.5309	8.80817	4.976
YIR036C	10.4045	9.89	7.68834	5.30769
YIR037W	10.8899	10.6947	7.41525	4.99275
YIR038C	10.811	9.51087	7.1626	5.22963
YIR039C	10.253	10.5	7.47888	5.45702
YIR042C	10.8488	10.1087	6.82308	5.50376
YKL033W-A	10.2884	10.901	8.53261	3.96571
YKL162C-A	10.3808	10.5696	8.83838	5.20301
YKR035W-A	10.8344	10.1005	7.55882	3.95478
YKR066C	10.4311	10.6511	7.84821	5.74242
YKR067W	10.3299	10.9438	7.55652	5.26573
YKR069W	10.8388	10.9361	7.44628	5.14174
YKR070W	10.8109	10.4943	7.05738	5.27465
YKR072C	10.8056	9.37736	6.58628	5.43262
YKR073C	10.3951	10.44	8.58586	6.75714
YKR074W	10.1083	10.1064	8.18056	5.57163
YKR075C	10.2528	10.5	8.42553	5.21053
YKR076W	10.8859	10.7671	8.46586	5.70165
YKR077W	9.81053	10.3457	8.25472	5.71328
YKR078W	10.5589	10.3933	7.46154	5.25333
YKR080W	10.0543	10.3	7.33684	5.17
YKR082W	10.4098	10.84	6.42718	4.37136
YKR084C	10.9491	10.4625	6.45238	4.7771
YOR097C	8.42848	9.0381	7.52849	6.54464
YOR099W	8.108	9.10927	7.64035	4.47299
YOR100C	8.2895	8.9646	7.18688	4.67707
YOR101W	8.51058	8.851	7.33333	4.75625
YOR104W	8.99248	7.33058	6.56452	5
YOR105W	8.58883	9.0981	5.82466	4.32376
YOR106W	8.8481	9.2551	5.52583	2.73125
YOR107W	8.91081	7.44776	6.82884	4.37974
YOR108W	8.10286	8.108	6.56371	4.37056
YOR109W	8.81093	10.4101	8.47423	6.54368
YOR111W	10.1	10.441	8.33654	5.09473
YOR112W	9.54811	10.4896	8.07273	4.54331
YOR113W	9.50488	10.957	7.88073	4.62097
YOR114W	8.88986	10.1075	7.04088	5.57778
YOR115C	8.40496	10.1003	7.67884	5.13376
YOR118W	8.09511	10.1088	6.62016	4.73333
YOR120W	8.94488	9.71029	7.73077	4.74699
YOR121C	8.50386	8.94643	7.63478	6.10236
YOR123C	10.1048	10.6105	8.86839	4.67269
YOR124C	9.48581	10.4948	7.62838	5.00758
YOR125C	10.8911	10.9875	8.08824	5.07491
YOR126C	8.35085	9.65094	6.88056	4.66049
YOR127W	8.30435	9.95098	7.73528	4.73636
YOR129C	8.53848	9.86667	6.80141	4.97576
YOR130C	9.28981	10.8353	6.05882	4.97436
YOR131C	8.41011	10.6106	5.55844	4.74091
YOR132W	8.10488	8.83654	4.8773	4.13103
YOR133W	8.5841	9.79808	8.36883	6.76555
YOR134W	9.25	10.5108	7.87273	4.26729
YOR135C	8.3881	9.2963	6.67388	4.4717
YOR136W	8.84045	9.31007	5.74545	4.30973
YOR137C	8.10399	9.74286	6.76823	4.73774
YOR138C	8.48855	9.27273	6.66887	5.16049
YOR139C	8.28889	10.0909	7.22321	4.50458
YOR140W	8.84825	5.5461	6.35238	5.33333
YOR141C	10.8825	10.2676	7.88889	3.52
YOR142W	9.10545	10.625	6.84478	5.29114
YOR144C	10.25	10.1033	7.47368	5.39062
YOR147W	10.1	10.1061	7.60577	3.79011
YOR150W	9.89381	10.8876	6.63333	4.65672
YOR152C	8.58285	9.95098	6.86823	4.31707
YOR153W	9.03838	9.70476	6.67442	3.15528
YOR154W	8.90109	10.4741	6.36286	5.03774
YOR155C	9.10103	10.1081	6.17606	4.61272
YOR156C	9.10841	9.6381	6.35075	4.52757
YOR158W	10.8353	10.7011	8.36667	3.42267
YOR161C	10.8839	10.9368	8.05405	4.95348
YOR162C	9.00926	10.29	7.064	4.62
YOR163W	8.85841	9.61011	6.64662	4.63771
YOR164C	9.9899	10.7108	6.844	4.49664
YOR165W	10.1088	10.3889	7.36753	4.70968
YOR166C	9.80589	10.31	6	4.44577
YOR167C	10.8104	10.1011	6.78528	4.47077
YOR170W	9.31085	10.3401	8.86869	6.24576
YOR171C	10.1083	10.1085	8.33333	6.51777
YOR172W	8.38441	9.43925	7.66864	4.74058
YOR173W	8.91043	9.10349	7.38655	4.75352
YOR175C	8.881	9.08257	5.68178	4.09524
YOR177C	9.48105	10.1	6.42537	4.95733
YOR178C	9.88	10.3093	5.52667	4.72248
YOR179C	8.88283	10.8105	5.56757	4.69663
YOR180C	8.3101	8.86957	5.78847	4.06512
YOR182C	10.2859	10.6875	8.44186	3.75576
YOR183W	10.3088	10.3929	8.66667	3.39091
YOR184W	3.45101	1.75641	1.57609	1.36207
YOR185C	8.1095	9.10929	7.38668	4.71069
YOR186W	8.28106	8.39837	6.42857	4.25673
YOR187W	10.4885	10.3485	8.80682	4.62727
YOR188W	8.1029	8.77778	6.06089	4.33333
[truncated: 3,050 more rows]
