# Supplementary material for: Disulfide stress-induced aluminium toxicity: molecular insights through genome-wide screening of Saccharomyces cerevisiae
Source: Royal Society of Chemistry journal article supplement (doi:10.1039/c3mt00083d), 2013-01-01
Supplement: c3mt00083d_2.xlsx [file c3mt00083d_2.xlsx]

## Sheet: Supplementary Information 3
Supplementary Information 3	Functional annotation of corresponding genes for the mutants sensitive to the dual stressors
ORF	Common Name	Functions	Fold Changes
YKL212W	SAC1	Suppressor of Actin, involved in hydrolysis of PtdIns[4]P, protein trafficking and cell wall maintenance	4.50331
YGR282C	BGL2	Beta-Glucanase, cell wall maintenance	4.43
YBR023C	CHS3	Chitin synthase III, synthesis of cell wall chitin	3.944
YHR142W	CHS7	CHitin Synthase-related, chitin biosynthesis	4.476
YNL084C	END3	ENDocytosis defective, endocytosis, actin cytoskeletal organization and cell wall morphogenesis	3.06
YNL294C	RIM21	Regulator of IME2, cell wall synthesis	4.663
YGR229C	SMI1	Suppressor of MAR Inhibitor, cell wall synthesis	2.5
YOR247W	SRL1	Suppressor of Rad53 null Lethality, cell wall stability	4.583
YGL028C	SCW11	Soluble Cell Wall protein, possible role in conjugation during mating	3.28571
YGR279C	SCW4	Soluble Cell Wall protein, together with scw10 mutants exhibit defects in mating	3.58163
YGL027C	CWH41	Calcofluor White Hypersensitive, involved in cell wall beta 1,6 glucan and asparagine-linked protein glycosylation, ER protein quality control and sensing of ER stress	1.597
YDL074C	BRE1	BREfeldin A sensitivity, histone methylation, cell cycle control and repair	3.161
YCR063W	BUD31	BUD site selection, cell cycle	3.563
YCR094W	CDC50	Cell Division Cycle, control cell polarity	1.987
YGL190c	CDC55	Cell Division Cycle, cell cycle control	3.108
YGL003C	CDH1	CDC20 Homolog, cell cycle control	2.976
YIL035C	CKA1	Casein Kinase Alpha subunit, cell growth and proliferation	4.494
YGL215W	CLG1	Cyclin-Like Gene, cell cycle control	3.431
YMR199W	CLN1	CycLiN, cell cycle control	3.364
YPL256C	CLN2	CycLiN, cell cycle control	5.272
YCR065W	HCM1	High-Copy suppressor of Calmodulin, cell cycle control, positive regulation of transcription, oxidative stress response	2.519
YBR133C	HSL7	Histone Synthetic Lethal, cell cycle control	4.268
YDL040C	NAT1	N-terminal AcetylTransferase, cell cycle control	3.27
YNL289W	PCL1	Pho85 CycLin, cycline dependent cell cycle regulation	4.28
YPL219W	PCL8	Pho85 CycLin, regulate glycogen synthase	4.901
YPL031C	PHO85	PHOsphate metabolism, cyclin-dependent kinase, cell cycle control	3.182
YLR079W	SIC1	Substrate/Subunit Inhibitor of Cyclin-dependent protein kinase, cell cycle control	3.253
YIL123W	SIM1	Start Independent of Mitosis, DNA replication and cell cycle regulation	2.08
YDR310C	SUM1	SUppresor of Mar1-1, regulate transcription and cell cycle check point	2.591
YIL135C	VHS2	Viable in a Hal3 Sit4 background, possibly role in cell cycle progression	3.545
YJL013C	MAD3	Mitotic Arrest-Deficient, cell cycle check point	4.66346
YMR294W	JNM1	Just Nuclear Migration, nuclear and mitotic spindle migration	4.30714
YPL269W	KAR9	KARyogamy, ensure mitotic spindle correct positioning	5.12264
YPL174C	NIP100	Nuclear ImPort, mitotic spindle correct positioning	4.34375
YCR002C	CDC10	Cell Division Cycle, component of the septin ring that is required for cytokinesis	3.267
YKR091W	SRL3	Suppressor of rad53 Lethality, potential Cdc28p substrate	4.37342
YPL033C	SRL4	Suppressor of Rad53 null Lethality or Suppressor of Rad53 and Lcd1, possible role in regulation of dNTP production	4.43939
YDR350C	ATP22	ATPase synthase, specific translational activator for the mitochondrial ATP6 mRNA, encoding a subunit of F1F0 ATP synthase; localized to the mitochondrial inner membrane	3.20238
YPL271W	ATP15	ATP synthase, synthesis of ATP	2.789
YDR377W	ATP17	ATP synthase	3.34
YDR298C	ATP5	ATP synthase, synthesis of ATP	3.19
YML129C	COX14	Cytochrome c Oxidase, mitochondrial respiration	4.366
YJL003W	COX16	Cytochrome c Oxidase, mitochondrial respiration	2.598
YGR062C	COX18	Cytochrome c Oxidase, mitochondrial respiration	4.757
YJR048W	CYC1	CYtochrome C, mitochondrial respiration	3.745
YOR136W	IDH2	Isocitrate DeHydrogenase, TCA cycle	4.31
YIL125W	KGD1	alpha-KetoGlutarate Dehydrogenase, tricarboxylic acid (TCA) cycle	4.291
YPR002W	PDH1	prpD Homolog, mitochondrial respiration	3.829
YJL023C	PET130	PETite colonies, respiration	4.01
YJR034W	PET191	PETite colonies, cytochrome c oxidase assembly	2.482
YFR033C	QCR6	ubiQuinol-cytochrome C oxidoReductase, mitochondrial electron transport chain	4.446
YDR065W	RRG1	Required for Respiratory Growth, mitochondrial genome maintenance	3.89
YDR115W		Mitochondrial ribosomal protein of the large subunit, respiratory growth	4.46
YBR037C	SCO1	Suppressor of Cytochrome Oxidase deficiency, cytochrome c oxidase and respiration	4.26842
YJR025C	BNA1	Biosynthesis of Nicotinic Acid, NAD biosynthesis	4.56481
YJR049C	UTR1	Unidentified Transcript, ATP-NADH kinase	3.27679
YEL041W	YEF1	ATP-NADH kinase, phosphorylates both NAD and NADH	4.56209
YGL071W	AFT1	Activator of Ferrous Transport, transcription factor for iron homeostasis	2.089
YPL202C	AFT2	Activator of Fe (iron) Transcription, iron homeostasis and oxidative stress response	5.323
YBR290W	BSD2	Bypass Sod1p Defects, metal ion transport	2.278
YDR270W	CCC2	Cross-Complements Ca(2+) phenotype of csg1, reuired for copper transport	4.093
YOR382W	FIT2	Facilitator of Iron Transport, involved in the retention of siderophore-iron in the cell wall	4.536
YOR383C	FIT3	Facilitator of Iron Transport	4.389
YLL051C	FRE6	Ferric Reductase, expression induced by low iron levels	4.536
YJR040W	GEF1	Glycerol Ethanol, Ferric requiring, cation homeostasis	1.93
YNL291C	MID1	Mating pheromone-Induced Death, calcium channel	2.461
YMR177W	MMT1	Mitochondrial Metal Transporter	2.81
YJR059W	PTK2	Putative serine/Threonine protein Kinase, ion transport across plasma membrane	2.272
YBL082C	ALG3	Asparagine Linked Glycosylation, synthesis of oligosaccharide for glycosylation	4.462
YPL227C	ALG5	Asparagine-Linked Glycosylation, glucose transfer	2.926
YOR067C	ALG8	Asparagine-Linked Glycosylation, lipid-linked oligosaccharide biosynthesis	4.591
YJR005W	APL1	clathrin Adaptor Protein complex Large chain, vesicle mediated transport	4.255
YPL195W	APL5	clathrin Adaptor Protein complex Large chain, transport of alkaline phosphatase	2.222
YGR261C	APL6	clathrin Adaptor Protein complex Large chain, vesicle mediated transport	4.367
YJR058C	APS2	clathrin Associated Protein complex Small subunit, plasma membrane protein sorting	3.321
YJL024C	APS3	clathrin Associated Protein complex Small subunit, vacuolar protein sorting	3.37
YDL192W	ARF1	ADP-Ribosylation Factor, regulate vesicle formation in Golgi	2.518
YGL005C	COG7	Conserved Oligomeric Golgi complex, vesicles mediated transport	3.946
YML071C	COG8	Conserved Oligomeric Golgi complex, vesicles mediated transport	3.713
YDR304C	CPR5	Cyclosporin-sensitive Proline Rotamase, respond to unfolded proteins in ER	4.621
YLR216C	CPR6	Cyclosporin-sensitive Proline Rotamase, respond to unfolded proteins in ER	5.244
YJR032W	CPR7	Cyclosporin-sensitive Proline Rotamase, cis-trans isomerization of proline	2.464
YBR036C	CSG2	Calcium Sensitive Growth, ER protein responsible for mannosylation	4.111
YJR054W	ERM6	ER-stress regulated Membrane protein, vacuolar protein of unknown function, potential Cdc28p substrate	4.403
YGR284C	ERV29	ER Vesicle, vesicle formation	4.475
YBR101C	FES1	The nucleotide exchange factor for BiP (Kar2p) in the endoplasmic reticulum	4.231
YJR031C	GEA1	Guanine nucleotide Exchange on ARF, vesicular transport	3.21
YHL031C	GOS1	GOlgi Snare, v-SNARE protein involved in Golgi transport	3.388
YPL244C	HUT1	Homolog of UDP-galactose Transporter, transport UDP-galacose into Golgi lumen	4.57
YNL322C	KRE1	Killer toxin Resistant, cell wall glycoprotein involved in beta-glucan assembly	2.307
YPR159W	KRE6	Killer toxin Resistant, ER membrane protein, beta-glucan synthase	2.819
YGR206W	MVB12	MultiVesicular Body sorting factor of 12 kilodaltons, vesicular protein sorting	4.677
YCR044C	PER1	protein Processing in the ER, GPI-phospholipase A2 activity	2.615
YLR268W	SEC22	SECretory, involved in protein transport between the ER and Golgi	1.264
YBR171W	SEC66	SECretory, SRP protein transport	2.913
YOR165W	SEY1	Synthetic Enhancement of YOP1, ER fusion and morphology	4.71
YBR172C	SMY2	Suppressor of MYo2-66, function unknown, possible role in vesicle formation	4.651
YLR119W	SRN2	Suppressor of rna1-1, protein sorting	4.31
YDR320C	SWA2	Synthetic lethal With Arf1, vasicular transport	2.739
YJL004C	SYS1	Required for targeting of the Arf-like GTPase Arl3p to the Golgi	2.546
YLR181C	VTA1	VpsTwenty Associated, endosomal protein sorting, regulates Vps4p activity	3.135
YGL161C	YIP5	Ypt-Interacting Protein, vesicle mediated transport	4.796
YAL023C	PMT2	Protein O-MannosylTransferase, involved in ER quality control	3.10092
YFL025C	BST1	Bypass of Sec Thirteen, production of vesicles	2.85217
YJR001W	AVT1	Amino acid Vacuolar Transport	3.27
YKR035W-A	DID2	Doa4-Independent Degradation, vacuolar protein sorting	3.955
YPL236C	ENV7	late ENdosome and Vacuole interface function, invlove in vacuolar function	4.591
YMR004W	MVP1	vacuolar protein sorting	3.816
YNL326C	PFA3	Protein Fatty Acyltransferase, vacuolar membrane fusion	4.794
YJR033C	RAV1	Regulator of (H+)-ATPase in Vacuolar membrane, protein transport	1.514
YDR202C	RAV2	Regulator of (H+)-ATPase in Vacuolar membrane, promotes assembly and reassembly of the holoenzyme	3.857
YPL032C	SVL3	Styryl dye Vacuolar Localization, possible role in vacuolar function	4.343
YOR106W	VAM3	VAcuolar Morphogenesis, mediates docking/fusion of late transport intermediates with the vacuole	2.831
YDL077C	VAM6	VAcuolar Morphogenesis, vacular membrane fusion	3.86
YGL212W	VAM7	VAcuolar Morphogenesis, vacular membrane fusion and vacuolar protein trafficking	3.299
YEL027W	VMA3	Vacuolar Membrane Atpase, copper and iron metal ion homeostasis	2.532
YEL051W	VMA8	Vacuolar Membrane Atpase, proton transport and ATP hydrolysis	3.844
YLL040C	VPS13	Vacuolar Protein Sorting	4.458
YHR012W	VPS29	Vacuolar Protein Sorting	3.663
YPL120W	VPS30	Vacuolar Protein Sorting	3.053
YDR080W	VPS41	Vacuolar Protein Sorting, protein transport	4.211
YGL095C	VPS45	Vacuolar Protein Sorting	1.292
YKR020W	VPS51	Vacuolar Protein Sorting	2.147
YDR484W	VPS52	Vacuolar Protein Sorting	3.018
YJR044C	VPS55	Vacuolar Protein Sorting	3.154
YDR136C	VPS61	Vacuolar Protein Sorting	2.114
YML097C	VPS9	Vacuolar Protein Sorting, vesicle-mediated vacuolar protein transport	1.637
YOR069W	VPS5	Vacuolar Protein Sorting	3.9386
YOR113W	AZF1	Asparagine-rich Zinc-Finger, invlove in mitochondrial transcription	4.621
YPL215W	CBP3	Cytochrome B mRNA Processing, mitochondrial cytochrome bc1 complex assembly	3.863
YBR120C	CBP6	Cytochrome B Protein synthesis, translation of the COB mRNA	4.013
YHR011W	DIA4	Digs Into Agar, mitochondrial seryl-tRNA synthetase	2.988
YLR091W	GEP5	GEnetic interactors of Prohibitins, possible role in mitochondrial maintenance	4.039
YCR071C	IMG2	Integrity of Mitochondrial Genome, large subunit	3.211
YOR147W	MDM32	Mitochondrial Distribution and Morphology, required for normal mitochondrial morphology and inheritance	3.89
YMR115W	MGR3	Mitochondrial Genome Required, responsible for degradation of misfolded mitochondrial proteins	4.458
YDR296W	MHR1	Mitochondrial Homologous DNA Recombination, mtDNA replication under oxidative stress	3.264
YOR201C	MRM1	Mitochondrial rRNA Methyltransferase	3.191
YBL090W	MRP21	Mitochondrial Ribosomal Protein, mitochondrial translation	5.105
YLR312W-A	MRPL15	Mitochondrial Ribosomal Protein Large subunit	4.533
YKR085C	MRPL20	Mitochondrial Ribosomal Protein Large subunit	4.438
YBR282W	MRPL27	Mitochondrial Ribosomal Protein Large subunit	3.655
YCR003W	MRPL32	Mitochondrial Ribosomal Protein Large subunit	4.133
YDR322W	MRPL35	Mitochondrial Ribosomal Protein, large subunit	2.488
YPL013C	MRPS16	Mitochondrial Ribosomal Protein Small subunit	4.147
YIR021W	MRS1	Mitochondrial RNA Splicing, splicing of intron	3.641
YOR158W	PET123	PETite colonies , mitochondrial ribosomal protein of the small subunit	3.423
YNL055C	POR1	PORin, mitochondrial membrane osmolarity and permeability	4.294
YPL188W	POS5	PerOxide Sensitive, mitochondrial NADH kinase, oxidative stress response	2.318
YOR187W	TUF1	Mitochondrial translation elongation factor Tu	4.627
YDR049W	VMS1	VCP/Cdc48-associated Mitochondrial Stress-responsive, mitochondrial-associated protein degradation during oxidative stress	4.905
YPL226W	NEW1	Nu+, ATP binding protein required for biogenesis of the small ribosomal subunit	4.548
YMR121C	RPL15B	Ribosomal Protein of the Large subunit	3.638
YPL220W	RPL1A	Ribosomal Protein of the Large subunit	4.609
YOR234C	RPL33B	Ribosomal Protein of the Large subunit	3.89
YDR500C	RPL37B	Ribosomal Protein of the Large subunit	3.555
YIL148W	RPL40A	Ribosomal Protein of the Large subunit	5.212
YJR094W-A	RPL43B	Ribosomal Protein of the Large subunit	5.218
YPL198W	RPL7B	Ribosomal Protein of the Large subunit	4.258
YDL081C	RPP1A	Ribosomal Protein P1 Alpha, ribosomal translation	4.198
YDL130W	RPP1B	Ribosomal Protein P1 Beta, translational elongation factors	4.709
YCR031C	RPS14A	Ribosomal Protein of the Small subunit, ribosome assembly and 20S pre-rRNA processing	3.673
YDR450W	RPS18A	Ribosomal Protein of the Small subunit	4.434
YJL136C	RPS21B	Ribosomal Protein of the Small subunit	4.331
YPR132W	RPS23B	Ribosomal Protein of the Small subunit	4.358
YOR167C	RPS28A	Ribosomal Protein of the Small subunit	4.481
YLR264W	RPS28B	Ribosomal Protein of the Small subunit	4.548
YOR182C	RPS30B	Ribosomal Protein of the Small subunit	3.856
YHR038W	RRF1	Ribosome Recycling Factor, mitochondrial protein synthesis and respiration	3.6
YPL193W	RSA1	RiboSome Assembly	2.988
YNL236W	SIN4	Switch Independent, subunit of the RNA polymerase II mediator complex, regulation of transcription	2.602
YCL037C	SRO9	Suppressor of rho3, ribosomal translation	3.916
YDL110C	TMA17	Translation Machinery Associated, function unknown, associates with ribosomes	4.829
YJR014W	TMA22	Translation Machinery Associated, Function unknown	4.028
YMR310C		Ribosome biosynthesis	4.081
YGR283C		S-adenosylmethionine-dependent methyltransferase, ribosome biogenesis	4.123
YDR317W	HIM1	High Induced Mutagenesis, DNA repair	3.843
YOR258W	HNT3	Histidine triad NucleoTide-binding, DNA repair	3.461
YDR291W	HRQ1	Homologous to RecQ protein, maintain genomic integrity	4.096
YEL044W	IES6	Ino Eighty Subunit, DNA repair	2.117
YLR320W	MMS22	Methyl MethaneSulfonate sensitivity, DNA replication repair and stabilize DNA replication fork	2.907
YBR100W	MMS4	Methyl MethaneSulfonate sensitivity, recombination and DNA repair	4.223
YLR265C	NEJ1	Nonhomologous End-Joining defective, DNA repair pathway	2.09
YKR082W	NUP133	NUclear Pore, nucleocytoplasmic transport, DNA repair, transcription and chromatin silencing at nuclear periphery	4.381
YPL022W	RAD1	RADiation sensitive, DNA repair	4.095
YJR035W	RAD26	RADiation sensitive, DNA repair	3.077
YGL163C	RAD54	RADiation sensitive, DNA repair	4.607
YJR052W	RAD7	RADiation sensitive, DNA repair	5
YPL024W	RMI1	RecQ Mediated genome Instability, response to DNA damage	2.258
YIL153W	RRD1	Resistant to Rapamycin Deletion, DNA repair and cell cycle	3.863
YLL002W	RTT109	Regulator of Ty1 Transposition, DNA repair	3.167
YDR369C	XRS2	X-Ray Sensitive, DNA repair and cell cycle check point	3.538
YKL114C	APN1	APurinic/apyrimidinic eNdonuclease, repair of DNA damage by oxidation and alkylating agents	3.4382
YOR175C	ALE1	Acyltransferase for Lyso-phosphatidylEthanolamine, fatty acid exchange	4.095
YOR377W	ATF1	AcetylTransFerase, lipid and sterol metabolism	4.587
YOR180C	DCI1	delta(3,5)-delta(2,4)-Dienoyl-CoA Isomerase, fatty acid metabolism	4.065
YDR294C	DPL1	Dihydrosphingosine Phosphate Lyase, regulate sphingolipid level	3.122
YMR015C	ERG5	ERGosterol biosynthesis, cytochrome P450 enzyme	4.514
YBR041W	FAT1	FATty acid transporter, acyl-CoA synthetase transorter	4.526
YNL323W	LEM3	Ligand-Effect Modulator, translocation of phospholipids and alkylphosphocholine drugs across the plasma membrane	1.899
YOR221C	MCT1	Malonyl-CoA:ACP Transferase, fatty acid synthesis	2.747
YNL123W	NMA111	Nuclear Mediator of Apoptosis, involve in heat stress, apoptosis and lipid homeostasis	4.245
YLR324W	PEX30	PEroXisome related, regulation of peroxisome	3.805
YDR244W	PEX5	PEroXin, protein transport	4.117
YIL160C	POT1	Peroxisomal Oxoacyl Thiolase, fatty acid beta oxidation	3.887
YPL057C	SUR1	SUppressor of Rvs161 and rvs167 mutations, sphingolipid biosynthesis	4.786
YDR297W	SUR2	SUppressor of Rvs161 and rvs167 mutations, sphingolipid biosynthesis	2.168
YLR372W	SUR4	SUppressor of Rvs161 and rvs167 mutations, fatty acid and sphingolipid biosynthesis	3.252
YJR019C	TES1	ThioESterase, fatty acid oxidation	4.442
YPL087W	YDC1	Yeast DihydroCeramidase, sphingolipid metabolism	4.108
YIL124W	AYR1	1-AcyldihYdroxyacetone-phosphate Reductase, phosphatidic acid biosynthesis and spore germination	1.85821
YNL094W	APP1	Actin Patch Protein, phosphatidate phosphatase, converts phosphatidate to diacylglycerol	3.327
YDR256C	CTA1	CaTalase A, break down hydrogen peroxide	4.272
YGR154C	GTO1	Glutathione Transferase Omega-like, oxidative stress response	4.253
YOR153W	PDR5	Pleiotropic Drug Resistance, multidrug transporter, responsible for cation resistance, and cellular detoxification	3.155
YBL064C	PRX1	PeroxiRedoXin, reduce hydroperoxides and oxidative stress	4.535
YPL239W	YAR1	Yeast Ankyrin Repeat, respond to osmotic and oxidative stress	2.65217
YJL121C	RPE1	Ribulose 5-Phosphate Epimerase, involve in pentose-phosphate pathway and mutants are sensitive to oxidative stress	4.9037
YDL225W	SHS1	Seventh Homolog of Septin, GTP-binding proteins and protein abundance increases in response to DNA replication stress	4
YJR055W	HIT1	HIgh Temperature growth, required for high temperature growth	2.76106
YDR276C	PMP3	Plasma Membrane Proteolipid, required for high salt concentration or low temperature	3.36842
YLR399C	BDF1	BromoDomain Fac, involved in transcription initiation at TATA-containing promoters	1.42105
YJR060W	CBF1	Centromere Binding Factor, nucleosome positioning and transcription factor	3.63717
YML036W	CGI121	tRNA modification, telomere maintenance and transcription	4.88889
YPL181W	CTI6	Cyc8-Tup1 Interacting protein, transcription regulation	4.36364
YJL006C	CTK2	Carboxy-Terminal domain Kinase, enhance transcription and translation	4.14563
YOR080W	DIA2	Digs Into Agar, involve in DNA replication, transcription; required for assembly of RSC complex and nucleosome positioning	3.98246
YNL136W	EAF7	Esa1-Associated Factor, histone acetylation, regulation of transcription, DNA repair	4.31214
YBR033W	EDS1	Expression Dependent on Slt2, transcription factor	4.22335
YPL101W	ELP4	ELongator Protein, required for Elongator structural integrity, modification of wobble nucleosides in tRNA, regulation of transcription	4.67619
YMR307W	GAS1	Glycophospholipid-Anchored Surface protein, required for cell wall assembly and transcriptional silencing	3.76636
YNL199C	GCR2	GlyColysis Regulation, transcriptional activator of glycosis related genes	4.45
YOL089C	HAL9	HALotolerance, overexpression increases salt tolerance while gene disruption decreases both salt tolerance and ENA1 expression, positive regulation of transcription	4.19802
YDR295C	HDA2	Histone DeAcetylase, maintain the telomere, histone deacetylation, negative regulation of transcription	3.486
YPL254W	HFI1	Histone H2A Functional Interactor, regulate gene expression through acetylation and transcription functions	4.18947
YBL008W	HIR1	Histone Regulation, regulate histone gene transcription	4.476
YOR123C	LEO1	LEft Open reading frame, histone methylation and transcription elongation	4.68269
YDR253C	MET32	METhionine requiring, reulate methionine transcription	4.241
YPL070W	MUK1	Possible role in regulation of transcription	4.68539
YLR266C	PDR8	Pleiotropic Drug Resistance, transcription factor	2.46957
YGL025C	PGD1	PolyGlutamine Domain, control transcription	2.103
YNR052C	POP2	PGK promoter directed OverProduction, 3' to 5' mRNA deadenylation, regulation of transcription	3.07143
YBR050C	REG2	REsistance to Glucose, type-1 Glc7p protein phosphatase repression	4.357
YJR063W	RPA12	RNA Polymerase A, regulate transcription	2.44762
YGL244W	RTF1	Restores TBP Function, regulates gene expression, transcription and chromatin structure	2.86747
YDR289C	RTT103	Regulator of Ty1 Transposition, transcription termination	3.08889
YDR392W	SPT3	SuPpressor of Ty's, subunit of transcriptional regulator complex	3.444
YCR081W	SRB8	Suppressor of RNA polymerase B, regulation of transcription	2.58
YNL025C	SSN8	Suppressor of SNF1, cyclin like component of RNA polymerase II holoenzyme; involved in phosphorylation of the RNA polymerase II, glucose repression and maintenance	1.64646
YDR463W	STP1	Species-specific tRNA Processing, transcription factor	3.858
YJL176C	SWI3	SWItching deficient, regulates transcription by remodeling chromosomes	1.76119
YLR182W	SWI6	SWItching deficient, transcription cofactor, regulates cell cycle, gene expression and transcription, role in unfolded protein response	3.23529
YFL049W	SWP82	SWi/snf-associated Protein, function unknown, may be positive regulation of transcription	4.57
YNL139C	THO2	suppressor of the Transcriptional defect of Hpr1 by Overexpression, involve in transcription elongation	3.66942
YIL101C	XBP1	XhoI site-Binding Protein, regulate transcription	4.30667
YDR451C	YHP1	Yeast Homeo-Protein, homeobox transcriptional repressors	4.89
YOR162C	YRR1	Yeast Reveromycin-A Resistant, involve in multi drug resistance, positive regulation of transcription	4.62
YJL056C	ZAP1	Zinc-responsive Activator Protein, transcriptional regulation of certain genes depend on zinc concentration	4.57595
YDR309C	GIC2	GTPase Interactive Component, budding and cellular polarization	4.48454
YOR134W	BAG7	Rho GTPase activating protein, regulating cell wall synthesis	4.268
YGR152C	RSR1	RaS-Related, bud site selection	4.53659
YDR477W	SNF1	Sucrose NonFermenting, transcription of glucose-repressed genes and peroxisome biogenesis	2.82407
YER027C	GAL83	GALactose metabolism, nuclear localization of the Snf1 kinase complex	1.89412
YEL062W	NPR2	Nitrogen Permease Regulator, regulate amino acid	3.24667
YPL089C	RLM1	Resistance to Lethality of MKK1P386 overexpression, MAP kinasepathway	4.35294
YPL203W	TPK2	Takashi's Protein Kinase, Ras-cAMP signalling	4.39796
YDL006W	PTC1	Phosphatase type Two C, inactivate MAPK cascade	3.00971
YDR099W	BMH2	Brain Modulosignalin Homologue, controls proteome at post-transcription, exocytosis, vesicle transport and Ras/MAPK signaling pathway	3.82796
YOR231W	MKK1	Mitogen-activated protein Kinase-Kinase, protein kinase C signaling pathway that controls cell integrity	4.07692
YKL126W	YPK1	Yeast Protein Kinase, signalling protein	3.89394
YLR150W	STM1	Suppressor of tom1, TOR signalling, response to nutrient stress, maintain telomere	3.38961
YDR389W	SAC7	Suppressor of Actin, a GTPase activating protein involved in cell signalling	4.11818
YPL066W	RGL1	Rho1 GEF Localizing, Rho1p signaling	3.02381
YLR371W	ROM2	RhO1 Multicopy suppressor, GDP/GTP exchange factor (GEF) for Rho1p and Rho2p	3.32292
YBR040W	FIG1	Factor-Induced Gene, intracellular signalling and cell fusion	4.48454
YIL105C	SLM1	Synthetic Lethal with Mss4, Phosphoinositide PI4,5P(2) binding protein, forms a complex with Slm2p; acts downstream of Mss4p and phosphorylated by the TORC2 complex	3.64198
YGR166W	TRS65	TRapp Subunit, a guanine nucleotide exchange factor regulating molecular trafficking, cell wall beta-glucan biosynthesis and the stress response	4.343
YDR137W	RGP1	Reduced Growth Phenotype, catalyzes nucleotide exchange in Ypt6p (ras-like G-protein) which is required for efficient fusion of vehicles with the golgi	1.75949
YOR188W	MSB1	Multicopy Suppressor of a Budding defect, 1,3-beta-glucan synthesis and the Pkc1p-MAPK pathway	4.333
YKL190W	CNB1	CalciNeurin subunit B, regulates Crz1p (a stress-response transcription factor)	2.25243
YDR332W	IRC3	Increased Recombination Centers, prutative RNA helicase	4.25882
YDR540C	IRC4	Increased Recombination Centers	2.93478
YML128C	MSC1	Meiotic Sister-Chromatid recombination, possible role in meiotic recombination	4.95146
YGL250W	RMR1	Reduced Meiotic Recombination, meiotic recombination and gene conversion	2.77174
YLR234W	TOP3	TOPoisomerase, conserved protein that functions in a complex with Sgs1p and Rmi1p to relax single-stranded negatively-supercoiled DNA preferentially, involved in telomere stability and regulation of mitotic recombination	2.42342
YDR359C	EAF1	Esa1p-Associated Factor, initiation of pre-meiotic DNA replication	2.471
YJR043C	POL32	POLymerase, DNA replication	3.59434
YEL072W	RMD6	Required for Meiotic nuclear Division, sporulation	4.44199
YIL099W	SGA1	Sporulation-specific GlycoAmylase, glycogn breakdown and sporulation	4.54167
YOR190W	SPR1	SPorulation Regulated, ascospore thermoresistance	3.98507
YNL081C	SWS2	Sick Without Securin, sporulation	4.01075
YNL128W	TEP1	TEnsin-like Phosphatase, sporulation	3.34568
YIR026C	YVH1	Yeast vaccinia virus VH1 Homolog, sporulation and glycogen accumulation	3.35897
YPR004C	AIM45	Altered Inheritance rate of Mitochondria, possible role in oxidative stress response	3.511
YJL046W	AIM22	Altered Inheritance rate of Mitochondria, required for lipoylation of Lat1p and Kgd2p	4.57143
YBR108W	AIM3	Altered Inheritance rate of Mitochondria, deletion can increase mitochondrial gemone loss	4.34112
YJR118C	ILM1	Increased Loss of Mitochondrial DNA, possible role in mitochondrial DNA maintenance	2.44578
YLR190W	MMR1	Mitochondrial Myo2p Receptor-related, mitochondrial distribution to buds	2.96341
YGL143C	MRF1	Mitochondrial peptide chain Release Factor, mitochondrial genome stability	2.60714
YER048C	CAJ1	Nuclear type II J heat shock protein, possible role in protein translocation	3.79528
YEL030W	ECM10	ExtraCellular Mutant, protein transport	4.4918
YML094W	GIM5	Gene Involved in Microtubule biogenesis, protein transport	2.14286
YML048W	GSF2	Glucose Signaling Factor, hexose transporters	3.41606
YPL240C	HSP82	Heat Shock Protein, pheromone signalling and miochondrial preprotein transport	3.79787
YGL016W	KAP122	KAryoPherin, protein transport	3.675
YPL270W	MDL2	MultiDrug resistance-Like, ATP-binding cassette transporter	4.67347
YML103C	NUP188	NUclear Pore, nucleocytoplasmic protein transport	3.04651
YPL058C	PDR12	Pleiotropic Drug Resistance, ATP-binding cassette transporter	4.55497
YLR237W	THI7	THIamine metabolism, plasma membrane transporter responsible for the uptake of thiamine	3.36264
YOR192C	THI72	THI7 homologue 2, thiamine transport	3.87054
YLL028W	TPO1	Transporter of Polyamines, plasma membrane sorting	4.72917
YJR074W	MOG1	Multicopy suppressor Of ts Gsp1, import nuclear protein	4.0102
YOR141C	ARP8	Actin-Related Protein, chromatin remodeling	3.52
YBR010W	HHT1	Histone H3, chromatin assembly	4.37173
YBL002W	HTB2	Histone H2B, chromatin assembly and H3 methylation	4.57527
YBL006C	LDB7	Low Dye Binding, component of RSC chromatin complex	4.58904
YNL307C	MCK1	Meiotic and Centromere regulatory ser, tyr-Kinase, chromosome segregation and regulating entry into meiosis	2.18681
YDR318W	MCM21	MiniChromosome Maintenance,	4.06818
YGL197W	MDS3	Mck1 Dosage Suppressor, negative regulator of early meiotic gene expression	3.44872
YDR469W	SDC1	Set1c, homologue of Dpy30 from C.elegans, histone methylation	3.97059
YHR207C	SET5	SET domain-containing, histone methylation	1.82828
YDR334W	SWR1	Sick With Rat8 ts, histone exchanges	5.06897
YGR270W	YTA7	Yeast Tat-binding Analog, regulates the histone gene expression	3.72642
YJR047C	ANB1	ANaeroBically induced, translation elongation factor eIF-5A	3.20792
YOR112W	CEX1	Cytoplasmic EXport protein, nuclear aminoacylation-dependent tRNA export pathway	4.54331
YDL160C	DHH1	DEAD box Helicase Homolog, may have a role in mRNA export and translation	3.41935
YLR172C	DPH5	DiPHthamide, translation elongation factor 2	4.15584
YPL021W	ECM23	ExtraCellular Mutant, pre-rRNA processing	3.8871
YBL032W	HEK2	HEterogeneous nuclear rnp K-like gene, conrol ASH1 mRNA translation	4.16304
YJR050W	ISY1	Interactor of SYf1p, snRNAs splicing	4.55769
YBL071w-A	KTI11	Kluveromyces lactis Toxin Insensitive, required for synthesis of diphthamide on translation factor eEF2, involved in modification of wobble nucleosides in tRNAs	3.58491
YPL213W	LEA1	Looks Exceptionally like U2A, component of U2 snRNP	3.22222
YDR378C	LSM6	Like SM, possible role in tRNA, snooRNA and rRNA processing	3.125
YDR335W	MSN5	Multicopy suppressor of SNF1 mutation, protein and mature tRNA transport	4.03409
YDR268W	MSW1	Mitochondrial aminoacyl-tRNA Synthetase, tryptophan	3.40789
YDR432W	NPL3	Nuclear Protein Localization, promotes elongation, regulates termination, and transport poly(A) mRNA from nucleus to cytoplasm; required for pre-mRNA splicing	2.9902
YBR022W	POA1	Phosphatase Of ADP-ribose 1"-phosphate, tRNA splicing	4.51337
YLR139C	SLS1	Sigma Like Sequence, mRNA transport to membrane-bound translation	2.45333
YMR125W	STO1	Suppressor of TOP1, transport nuclear poly(A)+ mRNA to cytoplasm, involved in nuclear mRNA degradation and telomere maintenance	3.69792
YPL009C	TAE2	Translation Associated Element, protein translation	3.76699
YNL299W	TRF5	Topoisomerase one-Related Function, nuclear RNA degradation and catalyzes polyadenylation of hypomodified tRNAs, and snoRNA and rRNA precursors	3.92632
YDR120C	TRM1	Transfer RNA Methyltransferase, create N2,N2-dimethylguanosine for tRNAs	3.15909
YPL207W	TYW1	Trna-YW synthesizing protein, synthesis of Wybutosine modified tRNA	4.625
YOR179C	SYC1	Similar to Ysh1 C-terminal, subunit of the APT subcomplex of cleavage and polyadenylation factor	4.69663
YJR024C	MDE1	Methylthioribulose-1-phosphate Dehydratase, methionine salvage pathway	3.58036
YPL023C	MET12	METhionine requiring, methylenetetrahydrofolate reductase (MTHFR) activity	3.69543
YJR010W	MET3	METhionine requiring, methionine metabolism	5.45192
YPL274W	SAM3	S-AdenosylMethionine metabolism, involve in utilization of S-adenosylmethionine as a sulfur source	3.96842
YPL273W	SAM4	S-AdenosylMethionine metabolism, conversion of S-adenosylmethionine to methionine	3.77528
YOR108W	LEU9	LEUcine biosynthesis, involve in leucine synthesis pathway	4.37056
YDR300C	PRO1	PROline requiring, proline biosynthesis	1.91919
YBR149W	ARA1	D-ARAbinose dehydrogenase, carbohydrate metabolism	4.45673
YIR031C	DAL7	Degradation of Allantoin, role in malate synthase and allantoin degradation	4.9375
YNL117W	MLS1	MaLate Synthase, utilization of non-fermentable carbon sources	2.77703
YJR051W	OSM1	OSMotic sensitivity, fumarate reductase	3.78505
YGR240C	PFK1	PhosphoFructoKinase, glycosis pathway	4.49495
YIL162W	SUC2	SUCrose fermentation	4.42763
YDR074W	TPS2	Trehalose-6-phosphate PhoSphatase, synthesizes carbohydrate trehalose	2.52427
YPL201C	YIG1	Yeast protein Interacting with Glycerol 3-phosphatase, anaerobic glycerol production	5.57447
YKL213C	DOA1	Degradation Of Alpha, regulate cellular ubiquitin concentration	3.71724
YDR069C	DOA4	Degradation Of Alpha, required for recycling ubiquitin from proteasome-bound ubiquitinated intermediates	2.02532
YJR036C	HUL4	Hect Ubiquitin Ligase, ubiquitin-protein ligases	3.46316
YMR304W	UBP15	UBiquitin-specific Protease, deubiquitination of protein	4.46018
YPL003W	ULA1	Ubiquitin-Like protein Activation, neddylation, protein degradation	4.40113
YOR191W	ULS1	Ubiquitin Ligase for SUMO conjugates, regulation of sumoylated substrates, mating type switching	4.02747
YDL013W	SLX5	Synthetic Lethal of unknown [X] function, function unknown (subunit of the Slx5-Slx8 SUMO-targeted ubiquitin ligase (STUbL) complex)	3.53261
YIL140W	AXL2	AXiaL budding pattern, budding site selection	4.56
YOR078W	BUD21	BUD site selection, responsible for random budding pattern	3.88983
YNL148C	ALF1	ALpha-tubulin Foldin, required for the folding of alpha-tubulin and possible role in microtubule maintenance	3.51376
YGL157W	ARI1	Aldehyde Reductase Intermediate, subclass of SDR	4.625
YFL010W-A	AUA1	Regulate ammonia of Gap1p	4.89474
YOR198C	BFR1	BreFeldin A Resistance, implicated in secretion and nuclear segregation, multicopy suppressor of BFA (Brefeldin A) sensitivity	3.68675
YPL241C	CIN2	Chromosome INstability, protein folding	4.01905
YGL195W	GCN1	General Control Nonderepressible	4.07955
YDR305C	HNT2	Histidine triad NucleoTide-binding, dinucleoside triphosphate hydrolase	4.75294
YBR107C	IML3	Increased Minichromosome Loss, kinetochore function	4.6413
YKR080W	MTD1	Methylene Tetrahydrafolate Dehydrogenase, oxidation of cytoplasmic one-carbon units	5.18
YGL211W	NCS6	Needs Cla4 to Survive, protein required for thiolation of the uridine	3.50485
YIL164C	NIT1	NITrilase superfamily, nitrilase activity	4.75159
YLR315W	NKP2	Non-essential Kinetochore Protein	4.48175
YJR062C	NTA1	N-Terminal Amidase, removes the amide group	4.64151
YBR025C	OLA1	Obg-Like ATPase, ATPase activity on proteasome	4.60795
YDR316W	OMS1	OXA1 Multicopy Suppressor, response to OXA1 mutation	3.91463
YCR077C	PAT1	Protein Associated with Topoisomerase II, stabalize rDNA	2.16456
YLR273C	PIG1	Protein Interacting with Gsy2p	3.13291
YDR435C	PPM1	Protein Phosphatase Methyltransferase, methylates the C terminus of the protein phosphatase 2A catalytic subunit	3.75214
YPL192C	PRM3	Pheromone-Regulated Membrane protein, nuclear envelope fusion	5.35632
YGL053W	PRM8	Pheromone-Regulated Membrane protein	3.02222
YPL246C	RBD2	Possible rhomboid protease	4.2381
YJR004C	SAG1	Sexual Agglutination, cell adhesion	3.83333
YGL229C	SAP4	Sit4 Associated Protein, Sit4p protein phosphatase	4.63636
YIL011W	TIR3	TIp1-Related, anaerobic growth	5
YFR007W	YFH7	subfamily of P-loop kinases	2.84706
YIL097W	FYV10	Function required for Yeast Viability, involved in proteasome-dependent inactivation of gluconeogenisis, role in anti-apoptosis	3.416
YOR183W	FYV12	Function required for Yeast Viability, function unknown (required to survival from exposure to K1 killer toxin exposure)	3.39091
YNL133C	FYV6	Function required for Yeast Viability, function unknown (required to survival from exposure to K1 killer toxin exposure)	3.41026
YBR157C	ICS2	Increased Copper Sensitivity, function unknown (deletion does not show obvious defects in growth, spore germination, viability, or carbohydrate utilization)	4.41791
YJR008W	MHO1	Memo Homolog, function unknown (inhibits haploid invasive growth when overexpressed)	5.0303
YGL114W	OPT3	Function unknown, (member of oligopeptide transporter)	4.46429
YOR161C	PNS1	pH Nine Sensitive, function unknown (potential choline transporter)	4.95349
YLR082C	SRL2	Suppressor of Rad53 null Lethality, function unknown (overexpression suppresses the lethality caused by a rad53 null mutation)	4.65789
YMR151W	YIM2	Function unknown (unlikely to encode a protein)	4.72449
YJL120W	Unidentified gene	Function unknown	2.106
YLR235C	Unidentified gene	Function unknown	2.148
YGL039W	Unidentified gene	Function unknwon (possible role in reduce carbonyl compounds to chiral alcohols)	2.33333
YJR039W	Unidentified gene	Function unknown	2.72477
YJR038C	Unidentified gene	Function unknown	2.77143
YLR271W	Unidentified gene	Function unknown	2.79245
YLR149C	Unidentified gene	Function unknown	2.83333
YNL058C	Unidentified gene	Function unknown	3.08088
YNL143C	Unidentified gene	Function unknown	3.10638
YDL041W	Unidentified gene	Function unknown	3.1913
YLR269C	Unidentified gene	Function unknown	3.22963
YJR056C	Unidentified gene	Function unknown	3.27451
YJR037W	Unidentified gene	Function unknown	3.34314
YLR358C	Unidentified gene	Function unknown	3.35106
YPL205C	Unidentified gene	Funcion unknown	3.35165
YPR003C	Unidentified gene	Function unknown	3.36486
YJL022W	Unidentified gene	Function unknown	3.47312
YLR217W	Unidentified gene	Function unknown	3.51852
YPL077C	Unidentified gene	Function unknown	3.67164
YJL027C	Unidentified gene	Function unknown	3.76786
YGR290W	Unidentified gene	Function unknown	3.81373
YJL007C	Unidentified gene	Function unknown	3.84906
YNL057W	Unidentified gene	Function unknown	3.85849
YPL025C	Unidentified gene	Function unknown	3.86022
YDR290W	Unidentified gene	Function unknown	3.96078
YKL033W-A	Unidentified gene	Function unknown	3.96581
YDR426C	Unidentified gene	Function unknown	3.97
YGL072C	Unidentified gene	Function unknown	3.97849
YML058C-A	Unidentified gene	Function unknown	4.00826
YEL043W	Unidentified gene	Function unknwon (possible role in intracellular signalling)	4.08108
YBR032W	Unidentified gene	Function unknown	4.11374
YPR099C	Unidentified gene	Function unknown	4.12371
YDR114C	Unidentified gene	Function unknown	4.15
YPL272C	Unidentified gene	Function unknown	4.15385
YBR063C	Unidentified gene	Function unknown	4.19271
YDR094W	Unidentified gene	Function unknown	4.22667
YJR015W	Unidentified gene	Function unknown (possible role in membrane transport)	4.24719
YOR309C	Unidentified gene	Function unknown	4.24806
YPL035C	Unidentified gene	Function unknown	4.25
YJR026W	Unidentified gene	Fucntion unknown (retrotransposon TYA Gag gene co-transcribed with TYB Pol)	4.27027
YBL096C	Unidentified gene	Function unknown	4.27451
YIL100W	Unidentified gene	Function unknown	4.28289
YGL138C	Unidentified gene	Function unknown	4.29557
YBL010C	Unidentified gene	Function unkonwn	4.31068
YIR007W	Unidentified gene	Function unknown	4.31169
YOR152C	Unidentified gene	Function unknown	4.31707
YJR018W	Unidentified gene	Function unknown	4.32381
YOR105W	Unidentified gene	Function unknown	4.32386
YBR144C	Unidentified gene	Function unknown	4.34634
YPL014W	Unidentified gene	Function unknown	4.37195
YML102C-A	Unidentified gene	Function unknown	4.38462
YNL120C	Unidentified gene	Function unknown	4.38938
YJR020W	Unidentified gene	Function unknown	4.41803
YBR137W	Unidentified gene	Function unknown	4.41827
YBR113W	Unidentified gene	Function unknown	4.45192
YDL026W	Unidentified gene	Function unknown	4.45679
YGR153W	Unidentified gene	Function unknown	4.46667
YLR072W	Unidentified gene	Function unknown	4.49359
YIL152W	Unidentified gene	Function unknown	4.51829
YLR280C	Unidentified gene	Function unknown	4.53226
YIL163C	Unidentified gene	Function unknown	4.54605
YIL102C	Unidentified gene	Function unknown	4.55634
YPL247C	Unidentified gene	Function unknown (overexpression causes a cell cycle delay or arrest)	4.56436
YJL021C	Unidentified gene	Function unknown	4.60204
YBR051W	Unidentified gene	Function unknown	4.60317
YJR011C	Unidentified gene	Function unknown	4.60396
YBR013C	Unidentified gene	Function unknown	4.6117
YIL165C	Unidentified gene	Function unknown	4.64744
YBR134W	Unidentified gene	Function unknown	4.67895
YBR027C	Unidentified gene	Function unknown	4.7076
YGR219W	Unidentified gene	Function unknown	4.72222
YBL083C	Unidentified gene	Function unknown	4.75969
YER076C	Unidentified gene	Function unknown	4.81081
YJR061W	Unidentified gene	Function unknown	4.83333
YPL068C	Unidentified gene	Function unknown	4.88827
YJL017W	Unidentified gene	Function unknown	4.89423
YBR285W	Unidentified gene	Function unkonwn	4.93258
YPL216W	Unidentified gene	Function unknown	5.0303
YPL191C	Unidentified gene	Function unknown	5.17822
YIR024C	Unidentified gene	Function unknown	5.20155
YPL197C	Unidentified gene	Function unknown	5.32323
YDR433W	Unidentified gene	Function unknown	2.54206
YDR306C	Unidentified gene	Function unknown	4.38947
YPL245W	Unidentified gene	Function unknown	4.43396
YLR152C	Unidentified gene	Function unknown	4.45946
YOR139C	Unidentified gene	Function unknown	4.50459
YHR078W	Unidentified gene	Function unknown (possible role in osmolarity regulation)	4.47934
YJL028W	Unidentified gene	Function unknown (may interact with ribosome)	4.34
YOR186W	Unidentified gene	Function unknown (possible role in heat stress response)	4.257
YPL196W	Unidentified gene	Function unknown (possible role in oxidative stress response)	4.341
YGL218W	Unidentified gene	Function unknown (possible role in stress response)	4.468
YBL055C	Unidentified gene	Function unknown (possible role in apoptosis)	4.623
