# Supplementary material for: Disulfide stress-induced aluminium toxicity: molecular insights through genome-wide screening of Saccharomyces cerevisiae
Source: Royal Society of Chemistry journal article supplement (doi:10.1039/c3mt00083d), 2013-01-01
Supplement: c3mt00083d_3.xlsx [file c3mt00083d_3.xlsx]

## Sheet: Sheet1
Supplementary Information 4	Uncharacterized genes that contain binding sequence for potential transcription factors
Transcription factor sequence	ORF	Start	End	Sequence	Fold change
PDRE (CCGCGG)	YBR027C	-730	-725	gattCCGCGGttga	4.7076
	YBR134W	-1688	-1683	ttcgCCGCGGtgct	4.67895
	YBR137W	-396	-391	aaatCCGCGGtata	4.41827
	YDR276C	-1000	-995	aataCCGCGGaaaa	3.36842
	YLR152C	-321	-316	ctttCCGCGGcgct	4.45946
	YLR269C	-825	-820	ttgcCCGCGGcaat	3.22963
	YLR271W	-701	-696	attgCCGCGGgcaa	2.79245
	YLR399C	-336	-331	ttagCCGCGGaaag	1.42105
	YNL133C	-1526	-1521	acggCCGCGGcaat	3.41026
	YOR152C	-264	-259	ctgcCCGCGGgtat	4.31707
		-1067	-1062	gattCCGCGGaaag
		-1084	-1079	ggcaCCGCGGcatg
		-1245	-1240	agttCCGCGGagac
		-1139	-1134	cgacCCGCGGgtga
	YPL025C	-179	-174	gatgCCGCGGataa	3.86022
		-188	-183	tgggCCGCGGatgc
	YPL068C	-219	-214	tattCCGCGGaaca	4.88827
MBP1/MBF1 (ACGCGTNA)	YIR024C	-678	-671	taggACGCGTGAtact	5.20155
	YJL016W	-724	-717	gaagACGCGTAAggag	4.89423
	YJL120W	-1455	-1448	ttccACGCGTCAatcc	2.106
	YJR056C	-1459	-1452	tttgACGCGTTAggcg	3.27451
		-1457	-1450	cctaACGCGTCAaaag
	YLR072W	-1847	-1840	tttgACGCGTAAtttg	4.49359
		-1849	-1842	aattACGCGTCAaaga
	YPL014W	-288	-281	ggtgACGCGTAAagga	4.37195
		-286	-279	ctttACGCGTCAccca
		-1833	-1826	agagACGCGTAAttga
PHO4 (CACGTG)	YBR051W	-882	-877	atatCACGTGatca	4.60317
		-1133	-1128	gcaaCACGTGagtt
	YDR094W	-1676	-1671	agctCACGTGgtcc	4.22667
	YEL043W	-151	-146	tggtCACGTGcgac	4.08108
		-1194	-1189	gggtCACGTGctgc
	YJR018W	-1880	-1875	aacaCACGTGctct	4.32381
	YJR038C	-452	-447	tgtgCACGTGtgag	2.77143
	YJR061W	-1920	-1915	tatcCACGTGctta	4.83333
	YLR149C	-214	-209	gtgtCACGTGacat	2.83333
	YML057C-A	-1056	-1051	ggacCACGTGaaaa	4.00826
		-1394	-1389	gcgcCACGTGgcaa
	YNL094W	-437	-432	gggtCACGTGgtcg	3.327
	YOR152C	-167	-162	aataCACGTGcaag	4.31707
	YOR183W	-1189	-1184	gaagCACGTGgaga	3.39091
	YPL068C	-253	-248	cgctCACGTGctgc	4.88827
		-313	-308	gggtCACGTGgcct
	YPR099C	-1862	-1857	catcCACGTGacca	4.12371
HSF1/HSTF (CNNGAANNTTCNNG)	YLR082C	-1484	-1471	ttttCAAGAAGATTCGGGttgg	4.65789
	YLR152C	-484	-471	gtttCAAGAAACTTCGGGgata	4.45946
	YPL191C	-1861	-1848	gatcCTGGAAGTTTCTAGctcg	5.17822
CIN5/YAP4 and CAD1/YAP2 (TTACTAA)	YBR063C	-1768	-1762	agtaTTACTAAcccg	4.19271
	YBR137W	-1918	-1912	tataTTACTAAtggt	4.41827
	YBR285W	-915	-909	tgtaTTACTAAactg	4.93258
	YDL013W	-576	-570	gataTTACTAAattc	3.53261
	YDL026W	-494	-488	tgctTTACTAAatca	4.45679
	YDL041W	-1728	-1722	gcctTTACTAAgtaa	3.1913
	YDR094W	-1620	-1614	tccgTTACTAAtagg	4.22667
	YDR276C	-588	-582	cttaTTACTAAatct	3.36842
	YDR290W	-1970	-1964	cattTTACTAAaaga	3.96078
		-768	-762	ggcgTTACTAAtatt
		-223	-217	aagaTTACTAAtctc
	YGL114W	-296	-290	atcaTTACTAAtcga	4.46429
	YGL138C	-92	-86	cacaTTACTAAttat	4.29557
		-569	-563	tctaTTACTAAaagt
		-484	-478	ttagTTACTAAcagg
		-514	-508	atcgTTACTAAataa
		-35	-29	atcaTTACTAAatag
		-623	-617	tttgTTACTAAtgaa
	YIL152W	-234	-228	ctatTTACTAAgcca	4.51829
	YIL163C	-1208	-1202	agcaTTACTAAtgtt	4.54605
	YJL016W	-1172	-1166	cgttTTACTAAtaac	4.89423
	YJL022W	-1591	-1585	tacaTTACTAAcata	3.47312
	YJR008W	-1485	-1479	ctgtTTACTAAtcag	5.0303
	YJR011C	-1784	-1778	ccagTTACTAAaaca	4.60396
	YJR015W	-1517	-1511	ccagTTACTAAaaca	4.24719
	YJR018W	-533	-527	tccgTTACTAAagat	4.32381
	YJR020W	-1748	-1742	tccgTTACTAAagat	4.41803
	YJR061W	-474	-468	ttttTTACTAAgcca	4.83333
	YLR072W	-521	-515	cttaTTACTAAtgcc	4.49359
	YLR082C	-397	-391	aataTTACTAAaaac	4.65789
	YLR358C	-1732	-1726	tatgTTACTAAtgaa	3.35106
	YOR152C	-1110	-1104	agatTTACTAAgact	4.31707
		-861	-855	gatcTTACTAAtaaa
	YOR183W	-452	-446	ctcaTTACTAAcatt	3.39091
	YOR309C	-1720	-1714	tatgTTACTAAtata	4.24806
	YPL014W	-39	-33	cgctTTACTAAgaag	4.37195
	YPL025C	-279	-273	ttatTTACTAAatta	3.86022
	YPL197C	-686	-680	tttaTTACTAAtaca	5.32323
	YPL216W	-90	-84	tctcTTACTAAgtct	5.0303
		-1073	-1067	tcttTTACTAAttga
		-1294	-1288	ctgaTTACTAAatta
	YPL247C	-102	-96	ctgaTTACTAAatta	4.56436
	YPR099C	-451	-445	ttctTTACTAAttga	4.12371
MET4 (TGGCAAATG)	YIR007W	-1540	-1532	ttgtTGGCAAATGagtt	4.31707
	YIL163C	-772	-764	tcatTGGCAAATGcaga	4.54605
	YBL083C	-122	-114	caatTGGCAAATGatgg	4.75969
